# Supplementary material for: In situ Raman investigation of Dy complexation in Cl-bearing aqueous solutions at 20–300 °C
Source: Royal Society of Chemistry journal article supplement (doi:10.1039/d4dt02170c), 2025-01-01
Supplement: d4dt02170c9.pdf [file d4dt02170c9.pdf]

**Electronic Supplementary Information**  
**for**  
***In situ* Raman investigation of Dy complexation in Cl-bearing aqueous solutions at 20-300 °C**

Sarah E. Smith-Schmitz<sup>1\*</sup>, Nicole C. Hurtig<sup>2</sup>, Alexander P. Gysi<sup>1</sup>,

<sup>1</sup>New Mexico Bureau of Geology and Mineral Resources, New Mexico Institute of Mining and  
Technology, 801 Leroy Place, 87801 Socorro

<sup>2</sup>Dept. of Earth and Environmental Sciences, New Mexico Institute of Mining and Technology, 801  
Leroy Place, 87801 Socorro

\*corresponding author: sarah.smith@nmt.edu

Supplementary Materials:

- Details of calculations used to simulate Dy speciation in experimental fluids
- Supplementary figures S1 and S2
- Supplementary tables S1 through S10
- Supplementary tables in xlsx format (Supplementary\_materials\_tables)
- Zipped folder containing reference raw spectra for solutions and DyCl<sub>3</sub> solids measured in this study (Supp\_raw files).
  - Supp\_raw\_MilliQ
  - Supp\_raw\_3mNaCl
  - Supp\_raw\_1.7mNaCl\_pH2
  - Supp\_raw\_1.7mNaCl\_pH4
  - Supp\_raw\_1mNaCl\_pH2
  - Supp\_raw\_1mNaCl\_pH5
  - Supp\_raw\_0.14mDyCl3\_pH2
  - Supp\_raw\_0.3mDyCl3\_pH2
  - Supp\_raw\_0.6mDyCl3\_pH2
  - Supp\_raw\_1.8mDyCl3\_pH2
  - Supp\_raw\_Capillary
  - Supp\_rawDyCl3\_solids
- Reference spectra for Dy<sub>2</sub>O<sub>3</sub> and Dy(OH)<sub>3</sub> solids area available in the supplementary materials provided by Hurtig et al.<sup>1</sup> (doi:10.1039/D4DT01086H).

## Speciation calculations

Thermodynamic data for the minerals and aqueous species in the Dy-Cl-O-H component system used to calculate speciation models presented in Figures 8 and 10 were taken from the MINES thermodynamic database (Gysi et al., 2023) with data sources used summarized in Table S6. The TSolMod library <sup>2</sup> is used in GEM-Selektor for all of the activity and equation of state (EoS) calculations. The revised Helgeson-Kirkham-Flowers EoS <sup>3-6</sup> was used to calculate all thermodynamic properties of aqueous species and the IAPS-84 EoS <sup>7</sup> was used to calculate the properties of H<sub>2</sub>O. The activity coefficients ( $\gamma_i$ ) of charged aqueous species were calculated using the extended Debye-Hückel equation (Robinson and Stokes, 1968)

$$\log(\gamma_i) = \frac{-A \cdot z_i^2 \cdot \sqrt{I}}{1 + a \cdot B \cdot \sqrt{I}} + \Gamma_\gamma + b_\gamma \cdot I \quad (\text{S1})$$

with the ionic strength ( $I$ ) calculated as

$$I = \frac{1}{2} \sum_i m_i \cdot z_i^2 \quad (\text{S2})$$

where A and B are the Debye-Hückel parameters from Helgeson et al. <sup>3</sup>;  $a_i$  is the ion size parameter taken from Kielland <sup>8</sup> for charged species;  $\Gamma_\gamma$  is a mole fraction to molality conversion factor;  $b_\gamma$  is the extended term parameter;  $m_i$  and  $z_i$  are the molal concentration and the charge of the  $i$ th aqueous species respectively. The  $\gamma_i$  was set to unity for all neutral aqueous species and the  $\gamma_i$  of water was calculated from the osmotic coefficient <sup>3</sup>.

### Peak fitting of the water stretching band and low frequency region

An example of the 3-peak de-convolution used to fit the water stretching band (Fig. 4 B, D, E; ESI Table S4) is shown in Figure S1 panels A and B. Sub-peak S-1 represents the most fully hydrogen bonded network water, S-2 represents intermediately networked water, and S-3 represents the least strongly hydrogen bonded water. Comparison of the relative contributions of each sub-peak at ambient temperature vs. 300 °C illustrates the changing structure of water with increasing temperature, i.e. with increasing temperature the hydrogen bond network of water decreases.

The peaks used to fit the Dy-O ( $\nu_{1,\text{Dy-O}}$ ) and Dy-Cl ( $\nu_{\text{Dy-Cl}}$ ) vibrational modes measured in the low frequency region (Fig. 6) of the DyCl<sub>3</sub>-bearing solutions and reported in Table 4 and ESI Table S5 are shown in Figure S1 panels C and D. At ambient temperature only the  $\nu_{1,\text{Dy-O}}$  could be fitted due to the overlap of the water translational region with the region for  $\nu_{\text{Dy-Cl}}$ , whereas at 300 °C both  $\nu_{1,\text{Dy-O}}$  and  $\nu_{\text{Dy-Cl}}$  could be fitted in the 1.8 mol/kg solution. Each vibrational mode was fitted using a single Gaussian peak.

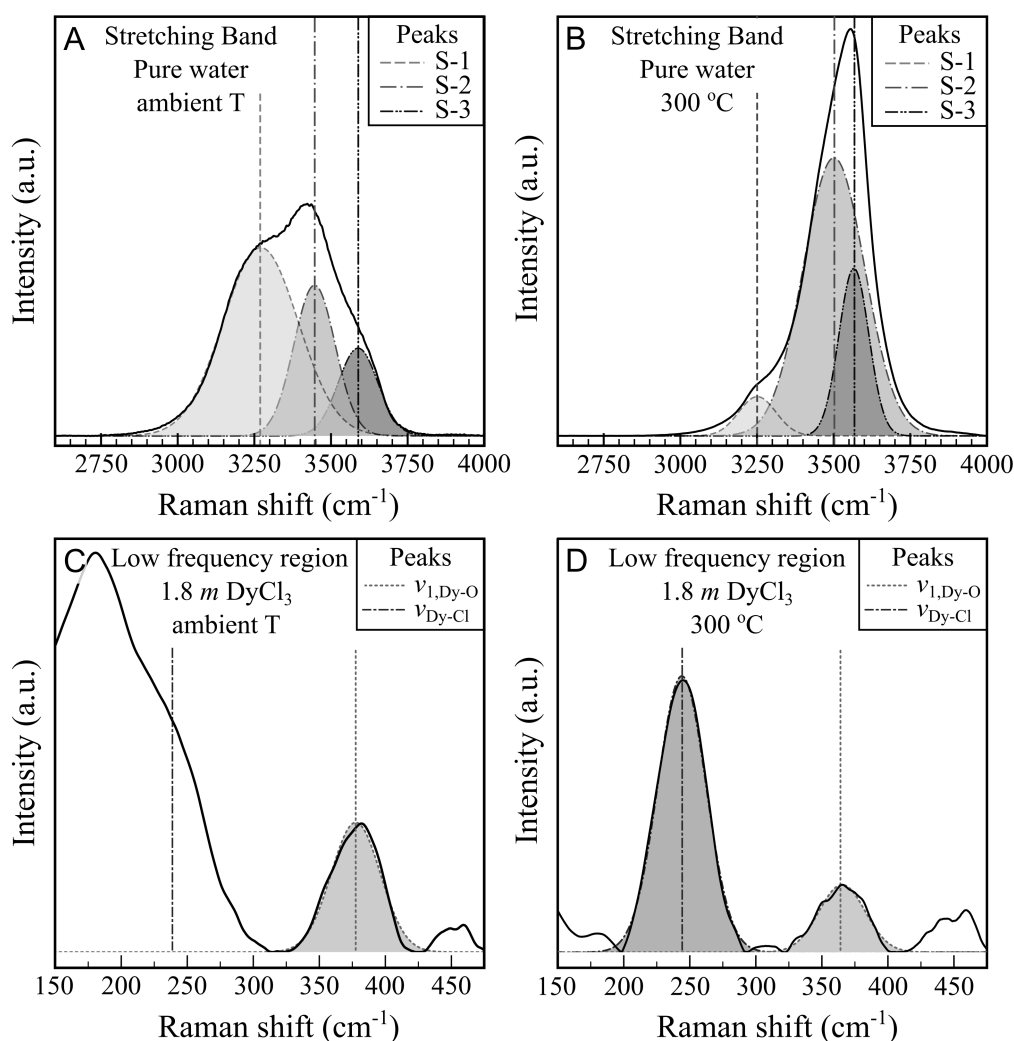

**Figure S1:** Representative examples peak fittings and de-convolution used in this study. Raman spectra of pure water (MilliQ) illustrating the fitting of the water stretching band with three sub-peaks (S-1 to S-3) at (A) ambient temperature and (B) 300 °C. Similar fits were used for other spectra as described in text and reported in Table S4. Raman spectra of 1.8 mol/kg DyCl<sub>3</sub> experimental solution illustrating the fitting of the low frequency region with peak(s) for (C) the Dy-O stretching mode of the Dy<sup>3+</sup> aqua ion ( $\nu_{1,\text{Dy-O}}$ ) at ambient temperature and (D)  $\nu_{1,\text{Dy-O}}$  of the Dy<sup>3+</sup> aqua ion and the Dy-Cl vibrational mode of Dy chloride complexes ( $\nu_{\text{Dy-Cl}}$ ) at 300 °C. Similar fits were used for other spectra as described in text and reported in Table S5.

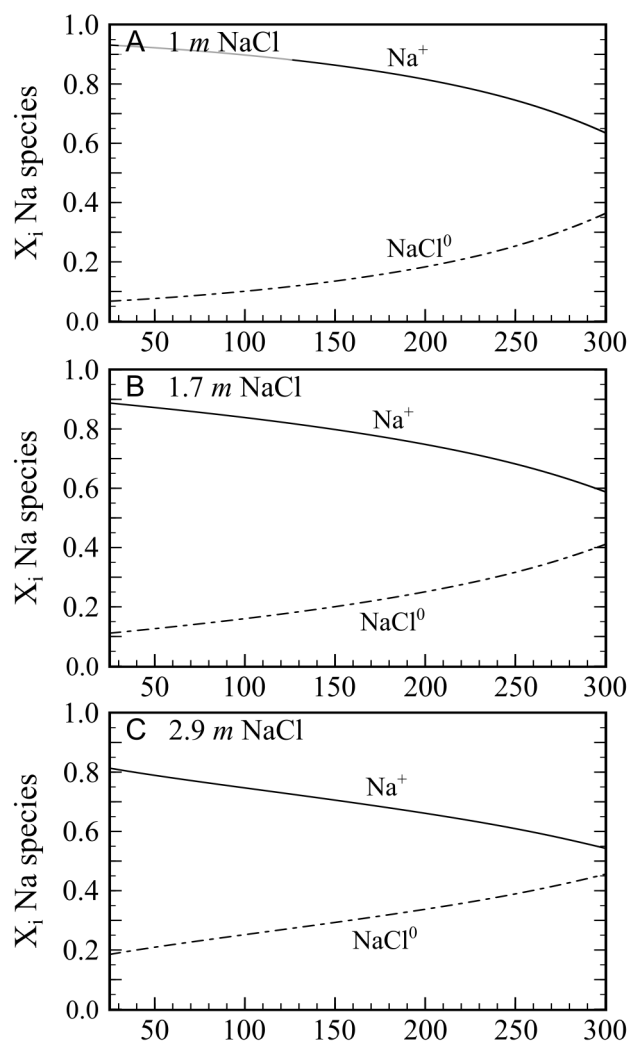

**Figure S2:** Simulated speciation in mole fraction ( $X_i$ ) Na species as a function of temperature. A) The 1 mol/kg NaCl, pH 2 background solution, B) the 1.7 mol/kg NaCl, pH 2 background solution, and C) the 2.9 mol/kg NaCl, pH 7 background solution. Models of the 1 mol/kg NaCl, pH 5 and 1.7 mol/kg NaCl, pH 4 background solutions predict speciation very similar to the lower pH models and are therefore not included. Thermodynamic equilibrium calculations were conducted using the GEMS code package and the MINES thermodynamic database. The thermodynamic properties for the Na species are from Shock and Helgeson <sup>4</sup> for  $\text{Na}^+$  and Miron et al. <sup>9</sup> for  $\text{NaCl}^0$  and  $\text{NaOH}^0$ .

**Table S1:** Crystal lattice parameters of Dy hydroxide [Dy(OH)<sub>3</sub>(s)] with a hexagonal crystal structure in the P6<sub>3</sub>/m space group derived from Rietveld refinement of powder XRD data.

| Data source                | a<br>Å | c<br>Å | $\alpha$<br>° | $\gamma$<br>° |
|----------------------------|--------|--------|---------------|---------------|
| This study                 | 6.287  | 3.575  | 90.1          | 119.9         |
| Beall et al. <sup>10</sup> | 6.286  | 3.577  | 90.0          | 120.0         |

**Table S2:** Peak centers for vibrational modes in reference Dy solids measured using the 532 nm and the 266 nm excitation lasers.

| Dy <sub>2</sub> O <sub>3</sub><br>cm <sup>-1</sup> | Dy <sub>2</sub> O <sub>3</sub><br>cm <sup>-1</sup> | Vibrational modes<br>(a-c)                     | Dy(OH) <sub>3</sub><br>cm <sup>-1</sup> | Dy(OH) <sub>3</sub><br>cm <sup>-1</sup> | Vibrational modes<br>(c-d)      | DyCl <sub>3</sub> anhydr.<br>cm <sup>-1</sup> | Vibrational modes<br>(f,g) | DyCl <sub>3</sub> ·xH <sub>2</sub> O<br>cm <sup>-1</sup> | DyCl <sub>3</sub> ·xH <sub>2</sub> O<br>cm <sup>-1</sup> | Vibrational modes<br>(g)                   |
|----------------------------------------------------|----------------------------------------------------|------------------------------------------------|-----------------------------------------|-----------------------------------------|---------------------------------|-----------------------------------------------|----------------------------|----------------------------------------------------------|----------------------------------------------------------|--------------------------------------------|
| 532 nm                                             | 266 nm                                             |                                                | 532 nm                                  | 266 nm                                  |                                 | 266 nm                                        |                            | 532 nm                                                   | 266 nm                                                   |                                            |
| 95                                                 |                                                    | F <sub>g</sub>                                 | 133                                     |                                         |                                 |                                               |                            | 62                                                       |                                                          | lattice vibrations                         |
| 119                                                |                                                    | F <sub>g</sub> +A <sub>g</sub> /A <sub>g</sub> | 262                                     |                                         |                                 |                                               |                            | 74                                                       |                                                          | lattice vibrations                         |
| 135                                                |                                                    | F <sub>g</sub>                                 | 314                                     | 311                                     | A <sub>g</sub>                  |                                               |                            | 85                                                       |                                                          |                                            |
| 145                                                |                                                    | E <sub>g</sub>                                 | 395                                     | 392                                     | A <sub>g</sub> /E <sub>2g</sub> |                                               |                            | 94                                                       |                                                          | δ <sub>ODyCl</sub> and δ <sub>ClDyCl</sub> |
| 176                                                |                                                    | F <sub>g</sub> +E <sub>g</sub> /F <sub>g</sub> | 406                                     | 405                                     | A <sub>g</sub>                  |                                               |                            | 106                                                      |                                                          | δ <sub>ODyCl</sub> and δ <sub>ClDyCl</sub> |
| 264                                                | 264                                                | E <sub>g</sub> /E <sub>g</sub> +F <sub>g</sub> | 502                                     | 499                                     | E <sub>1g</sub>                 |                                               |                            | 111                                                      |                                                          | δ <sub>ODyCl</sub> and δ <sub>ClDyCl</sub> |
| 327                                                | 326                                                |                                                | 697                                     | 692                                     |                                 |                                               |                            | 135                                                      |                                                          | δ <sub>ODyCl</sub> and δ <sub>ClDyCl</sub> |
|                                                    | 349                                                |                                                | 736                                     | 731                                     |                                 |                                               |                            | 153                                                      |                                                          |                                            |
| 372                                                | 370                                                | F <sub>g</sub> +A <sub>g</sub> /F <sub>g</sub> | 1077                                    | 1079                                    | δ <sub>OH</sub>                 |                                               |                            | 159                                                      |                                                          | ν <sub>Dy-Cl</sub>                         |
| 424                                                | 424                                                | F <sub>g</sub> /A <sub>g</sub>                 | 3597                                    | 3598                                    | ν <sub>OH</sub>                 |                                               |                            | 168                                                      |                                                          | ν <sub>Dy-Cl</sub>                         |
| 463                                                | 461                                                | F <sub>g</sub>                                 | 3611                                    | 3612                                    | ν <sub>OH</sub>                 |                                               |                            | 193                                                      |                                                          | δ <sub>ODyO</sub>                          |
|                                                    | 522                                                |                                                |                                         |                                         |                                 |                                               |                            | 209                                                      | 211                                                      | δ <sub>ODyO</sub>                          |
| 567                                                | 561                                                |                                                |                                         |                                         |                                 | 242                                           | ν <sub>Dy-Cl</sub>         | 240                                                      | 237                                                      | ν <sub>Dy-Cl</sub>                         |
| 584                                                | 583                                                | F <sub>g</sub>                                 |                                         |                                         |                                 | 255                                           | ν <sub>Dy-Cl</sub>         |                                                          | 269                                                      | ν <sub>Dy-Cl</sub>                         |
| 592                                                | 596                                                |                                                |                                         |                                         |                                 | 272                                           | ν <sub>Dy-Cl</sub>         | 315                                                      | 314                                                      | ν <sub>Dy-H2O</sub>                        |
|                                                    |                                                    |                                                |                                         |                                         |                                 | 340                                           | ν <sub>Dy-H2O</sub>        | 359                                                      | 348                                                      | ν <sub>Dy-H2O</sub>                        |
|                                                    |                                                    |                                                |                                         |                                         |                                 | 383                                           |                            |                                                          | 485                                                      |                                            |
|                                                    |                                                    |                                                |                                         |                                         |                                 | 425                                           |                            | 528                                                      |                                                          | ω <sub>H2O</sub>                           |
|                                                    |                                                    |                                                |                                         |                                         |                                 | 527                                           | ω <sub>H2O</sub>           | 564                                                      | 569                                                      | ω <sub>H2O</sub>                           |
|                                                    |                                                    |                                                |                                         |                                         |                                 |                                               |                            | 600                                                      | 604                                                      | ω <sub>H2O</sub>                           |
|                                                    |                                                    |                                                |                                         |                                         |                                 | 647                                           | ω <sub>H2O</sub>           | 618                                                      | 635                                                      | ω <sub>H2O</sub>                           |
|                                                    |                                                    |                                                |                                         |                                         |                                 |                                               |                            | 670                                                      | 672                                                      | ω <sub>H2O</sub>                           |
|                                                    |                                                    |                                                |                                         |                                         |                                 | 1598                                          | δ <sub>HOH</sub>           | 1621                                                     | 1622                                                     | δ <sub>HOH</sub>                           |
|                                                    |                                                    |                                                |                                         |                                         |                                 | 1638                                          | δ <sub>HOH</sub>           | 1637                                                     | 1638                                                     | δ <sub>HOH</sub>                           |
|                                                    |                                                    |                                                |                                         |                                         |                                 |                                               |                            | 1648                                                     | 1649                                                     | δ <sub>HOH</sub>                           |
|                                                    |                                                    |                                                |                                         |                                         |                                 |                                               |                            | 3224                                                     | 3231                                                     | ν <sub>H2O</sub>                           |
|                                                    |                                                    |                                                |                                         |                                         |                                 |                                               |                            | 3285                                                     | 3280                                                     | ν <sub>H2O</sub>                           |
|                                                    |                                                    |                                                |                                         |                                         |                                 | 3383                                          | ν <sub>H2O</sub>           | 3344                                                     | 3343                                                     | ν <sub>H2O</sub>                           |
|                                                    |                                                    |                                                |                                         |                                         |                                 | 3471                                          | ν <sub>H2O</sub>           | 3394                                                     | 3397                                                     | ν <sub>H2O</sub>                           |
|                                                    |                                                    |                                                |                                         |                                         |                                 | 3534                                          | ν <sub>H2O</sub>           | 3442                                                     | 3444                                                     | ν <sub>H2O</sub>                           |

References: (a) Schaack and Koningstein<sup>11</sup>; (b) Abrashev et al.<sup>12</sup>; (c) Hurtig et al.<sup>1</sup>; (d) Arunachalam et al.<sup>5</sup>; (e) Sanivarapu et al.<sup>6</sup>; (f) Paptheodorou<sup>13</sup>; (g) Oczko and Macalik<sup>14</sup>. The notation for the vibration types for coordinated OH<sup>-</sup> or H<sub>2</sub>O molecules: ω – wagging; ν – stretching modes; δ – bending mode.

**Table S3:** Peak center positions, peak areas, and full width half maximum (FWHM) for Raman modes in the low frequency region for background H<sub>2</sub>O-NaCl solutions.

|                 | $\nu_{\text{H}_2\text{O},\text{L-1}}$<br>cm <sup>-1</sup> | $A_{\text{H}_2\text{O},\text{L-1}}$ | FWHM<br>cm <sup>-1</sup>   |
|-----------------|-----------------------------------------------------------|-------------------------------------|----------------------------|
| <b>100 °C</b>   |                                                           |                                     |                            |
| MilliQ          | 367.3                                                     | 1.197                               | 39.94                      |
| 1 m NaCl-pH2    | 372.4                                                     | 1.237                               | 40.68                      |
| 1.7 m NaCl -pH2 | 367.0                                                     | 1.236                               | 36.49                      |
| 1.7 m NaCl-pH4  | 369.5                                                     | 1.224                               | 35.16                      |
| 1 m NaCl l-pH5  | 372.9                                                     | 1.162                               | 34.52                      |
| 3 m NaCl-pH7    | 374.3                                                     | 1.252                               | 44.81                      |
| <i>average</i>  |                                                           | <i>1.218</i>                        |                            |
| <i>3σ</i>       |                                                           | <i>0.099</i>                        |                            |
| <b>150 °C</b>   |                                                           |                                     |                            |
| MilliQ          | 370.5                                                     | 1.077                               | 31.33                      |
| 1 m NaCl-pH2    | 369.7                                                     | 1.318                               | 33.00                      |
| 1.7 m NaCl -pH2 | 367.4                                                     | 1.610                               | 32.46                      |
| 1.7 m NaCl-pH4  | 370.2                                                     | 1.738                               | 34.41                      |
| 1 m NaCl l-pH5  | 369.8                                                     | 1.185                               | 28.34                      |
| 3 m NaCl-pH7    | 370.6                                                     | 1.944                               | 37.57                      |
| <i>average</i>  |                                                           | <i>1.478</i>                        |                            |
| <i>3σ</i>       |                                                           | <i>1.017</i>                        |                            |
| <b>200 °C</b>   |                                                           |                                     |                            |
| MilliQ          | 370.8                                                     | 1.263                               | 30.00                      |
| 1 m NaCl-pH2    | 371.5                                                     | 1.261                               | 31.00                      |
| 1.7 m NaCl -pH2 | 369.9                                                     | 1.880                               | 32.58                      |
| 1.7 m NaCl-pH4  | 367.9                                                     | 1.942                               | 31.96                      |
| 1 m NaCl l-pH5  | 370.1                                                     | 1.347                               | 34.04                      |
| 3 m NaCl-pH7    | 370.7                                                     | 2.263                               | 38.92                      |
| <i>average</i>  |                                                           | <i>1.659</i>                        |                            |
| <i>3σ</i>       |                                                           | <i>1.277</i>                        |                            |
| <b>250 °C</b>   |                                                           |                                     |                            |
| MilliQ          | 370.2                                                     | 2.360                               | 38.68H <sub>2</sub> O-NaCl |
| 1 m NaCl-pH2    | 372.7                                                     | 1.552                               | 32.86                      |
| 1.7 m NaCl -pH2 | 369.3                                                     | 2.031                               | 33.82                      |
| 1.7 m NaCl-pH4  | 367.3                                                     | 2.110                               | 37.35                      |
| 1 m NaCl l-pH5  | 374.6                                                     | 1.654                               | 35.17                      |
| 3 m NaCl-pH7    | 368.8                                                     | 1.645                               | 39.00                      |
| <i>average</i>  |                                                           | <i>1.892</i>                        |                            |
| <i>3σ</i>       |                                                           | <i>0.9669</i>                       |                            |

**Table S3:** continued.

|                             | $\nu_{\text{H}_2\text{O,L-1}}$ | $A_{\text{H}_2\text{O,L-1}}$ | FWHM             |
|-----------------------------|--------------------------------|------------------------------|------------------|
|                             | $\text{cm}^{-1}$               |                              | $\text{cm}^{-1}$ |
| <b>300 °C</b>               |                                |                              |                  |
| MilliQ                      | 367.6                          | 1.264                        | 31.67            |
| 1 m NaCl-pH2                | 367.1                          | 1.575                        | 35.29            |
| 1.7 m NaCl-pH2              | 376.2                          | 1.920                        | 41.70            |
| 1.7 m NaCl-pH4              | 368.1                          | 2.442                        | 34.95            |
| 1 m NaCl-pH5                | 365.3                          | 1.692                        | 38.62            |
| 3 m NaCl-pH7                | 370.0                          | 1.962                        | 44.72            |
| <i>average</i>              |                                | <i>1.809</i>                 |                  |
| <i>3<math>\sigma</math></i> |                                | <i>1.201</i>                 |                  |

Symbols:  $\nu_{\text{H}_2\text{O,L-1}}$  = peak center position of the librational mode in background solutions used to correct  $\nu_{1,\text{Dy-O}}$ ;  $\tilde{\nu}_{\text{H}_2\text{O,T-1}}$  = peak center position for peak T-1 of the water translational region;  $A_{\text{H}_2\text{O,L-1}}$  = peak area of the librational mode in background solutions used to correct  $\nu_{1,\text{Dy-O}}$ ;  $A_{\text{H}_2\text{O,T-1}}$  = peak area of peak T-1 of the water translational region used to correct  $\nu_{\text{Dy-Cl}}$ .



**Table S4:** Peak center positions, peak areas, and FWHM for Raman modes in the water stretching band at 3000-3800 cm<sup>-1</sup> for background H<sub>2</sub>O-NaCl and DyCl<sub>3</sub>-bearing solutions.

| Solution ID                 | <i>Sub-peak S-1</i>                                |                                 |                          | <i>Sub-peak S-2</i>                                            |                                                    |                                 | <i>Sub-peak S-3</i>      |                                                                |                                                    | <i>Total</i><br>A <sub>H<sub>2</sub>O,S</sub> |                                 |                          |                                                                |
|-----------------------------|----------------------------------------------------|---------------------------------|--------------------------|----------------------------------------------------------------|----------------------------------------------------|---------------------------------|--------------------------|----------------------------------------------------------------|----------------------------------------------------|-----------------------------------------------|---------------------------------|--------------------------|----------------------------------------------------------------|
|                             | $\nu_{\text{H}_2\text{O,S-1}}$<br>cm <sup>-1</sup> | A <sub>H<sub>2</sub>O,S-1</sub> | FWHM<br>cm <sup>-1</sup> | A <sub>H<sub>2</sub>O,S-1</sub> /A <sub>H<sub>2</sub>O,S</sub> | $\nu_{\text{H}_2\text{O,S-2}}$<br>cm <sup>-1</sup> | A <sub>H<sub>2</sub>O,S-2</sub> | FWHM<br>cm <sup>-1</sup> | A <sub>H<sub>2</sub>O,S-2</sub> /A <sub>H<sub>2</sub>O,S</sub> | $\nu_{\text{H}_2\text{O,S-3}}$<br>cm <sup>-1</sup> |                                               | A <sub>H<sub>2</sub>O,S-3</sub> | FWHM<br>cm <sup>-1</sup> | A <sub>H<sub>2</sub>O,S-3</sub> /A <sub>H<sub>2</sub>O,S</sub> |
| <i>Background solutions</i> |                                                    |                                 |                          |                                                                |                                                    |                                 |                          |                                                                |                                                    |                                               |                                 |                          |                                                                |
| <b>Ambient T</b>            |                                                    |                                 |                          |                                                                |                                                    |                                 |                          |                                                                |                                                    |                                               |                                 |                          |                                                                |
| MilliQ                      | 3271                                               | 58667                           | 288.7                    | 0.5931                                                         | 3446                                               | 25806                           | 158.8                    | 0.2609                                                         | 3588                                               | 14437                                         | 152.6                           | 0.1460                   | 98909                                                          |
| 1 m NaCl-pH2                | 3271                                               | 51059                           | 275.3                    | 0.5144                                                         | 3446                                               | 33814                           | 166.9                    | 0.3406                                                         | 3588                                               | 14396                                         | 148.9                           | 0.1450                   | 99268                                                          |
| 1.7 m NaCl -pH2             | 3271                                               | 47254                           | 265.8                    | 0.4762                                                         | 3446                                               | 37604                           | 168.5                    | 0.3789                                                         | 3588                                               | 14377                                         | 148.7                           | 0.1449                   | 99235                                                          |
| 1.7 m NaCl-pH4              | 3271                                               | 47220                           | 266.3                    | 0.4760                                                         | 3446                                               | 37551                           | 169.1                    | 0.3785                                                         | 3588                                               | 14430                                         | 149.8                           | 0.1455                   | 99201                                                          |
| 1 m NaCl l-pH5              | 3271                                               | 51088                           | 274.6                    | 0.5147                                                         | 3446                                               | 33925                           | 167.8                    | 0.3418                                                         | 3588                                               | 14254                                         | 150.5                           | 0.1436                   | 99266                                                          |
| 3 m NaCl-pH7                | 3271                                               | 40324                           | 252.0                    | 0.4067                                                         | 3446                                               | 44811                           | 173.4                    | 0.4520                                                         | 3588                                               | 14006                                         | 148.4                           | 0.1413                   | 99140                                                          |
| <b>100 °C</b>               |                                                    |                                 |                          |                                                                |                                                    |                                 |                          |                                                                |                                                    |                                               |                                 |                          |                                                                |
| MilliQ                      | 3288                                               | 42680                           | 270.0                    | 0.4315                                                         | 3452                                               | 34246                           | 166.3                    | 0.4315                                                         | 3584                                               | 21990                                         | 160.0                           | 0.3462                   | 98916                                                          |
| 1 m NaCl-pH2                | 3288                                               | 36956                           | 259.6                    | 0.3741                                                         | 3452                                               | 40094                           | 169.1                    | 0.4058                                                         | 3584                                               | 21744                                         | 156.1                           | 0.2201                   | 98795                                                          |
| 1.7 m NaCl -pH2             | 3288                                               | 34788                           | 255.8                    | 0.3526                                                         | 3452                                               | 42447                           | 168.1                    | 0.4302                                                         | 3584                                               | 21423                                         | 153.3                           | 0.2171                   | 98658                                                          |
| 1.7 m NaCl-pH4              | 3288                                               | 34846                           | 254.9                    | 0.3522                                                         | 3452                                               | 42677                           | 169.7                    | 0.4314                                                         | 3584                                               | 21405                                         | 155.4                           | 0.2164                   | 98928                                                          |
| 1 m NaCl l-pH5              | 3288                                               | 37047                           | 260.6                    | 0.3752                                                         | 3452                                               | 39984                           | 169.3                    | 0.4049                                                         | 3584                                               | 21720                                         | 156.3                           | 0.2199                   | 98751                                                          |
| 3 m NaCl-pH7                | 3288                                               | 30995                           | 246.0                    | 0.3133                                                         | 3452                                               | 47264                           | 170.0                    | 0.4777                                                         | 3584                                               | 20675                                         | 153.5                           | 0.2090                   | 98933                                                          |
| <b>150 °C</b>               |                                                    |                                 |                          |                                                                |                                                    |                                 |                          |                                                                |                                                    |                                               |                                 |                          |                                                                |
| MilliQ                      | 3293                                               | 32370                           | 257.6                    | 0.3286                                                         | 3453                                               | 37651                           | 167.7                    | 0.3822                                                         | 3578                                               | 28496                                         | 164.1                           | 0.2893                   | 98516                                                          |
| 1 m NaCl-pH2                | 3293                                               | 28627                           | 251.6                    | 0.2913                                                         | 3453                                               | 41527                           | 167.3                    | 0.4225                                                         | 3578                                               | 28135                                         | 160.0                           | 0.2862                   | 98288                                                          |
| 1.7 m NaCl -pH2             | 3293                                               | 27470                           | 246.4                    | 0.2776                                                         | 3453                                               | 43800                           | 167.3                    | 0.4427                                                         | 3578                                               | 27678                                         | 159.1                           | 0.2797                   | 98948                                                          |
| 1.7 m NaCl-pH4              | 3293                                               | 27741                           | 250.1                    | 0.2807                                                         | 3453                                               | 43109                           | 166.0                    | 0.4362                                                         | 3578                                               | 27967                                         | 160.8                           | 0.2830                   | 98818                                                          |
| 1 m NaCl l-pH5              | 3293                                               | 28662                           | 251.5                    | 0.2903                                                         | 3453                                               | 41818                           | 167.9                    | 0.4235                                                         | 3578                                               | 28260                                         | 160.0                           | 0.2862                   | 98740                                                          |
| 3 m NaCl-pH7                | 3293                                               | 25488                           | 239.6                    | 0.2575                                                         | 3453                                               | 47119                           | 165.9                    | 0.4760                                                         | 3578                                               | 26387                                         | 156.0                           | 0.2666                   | 98993                                                          |
| <b>200 °C</b>               |                                                    |                                 |                          |                                                                |                                                    |                                 |                          |                                                                |                                                    |                                               |                                 |                          |                                                                |
| MilliQ                      | 3291                                               | 22646                           | 247.0                    | 0.2294                                                         | 3466                                               | 46019                           | 185.4                    | 0.4662                                                         | 3579                                               | 30038                                         | 167.2                           | 0.3043                   | 98702                                                          |
| 1 m NaCl-pH2                | 3291                                               | 23216                           | 254.5                    | 0.2351                                                         | 3466                                               | 49495                           | 191.5                    | 0.5011                                                         | 3579                                               | 26054                                         | 169.1                           | 0.2638                   | 98764                                                          |
| 1.7 m NaCl -pH2             | 3291                                               | 21592                           | 243.4                    | 0.2195                                                         | 3466                                               | 49947                           | 182.8                    | 0.5077                                                         | 3579                                               | 26847                                         | 164.2                           | 0.2729                   | 98386                                                          |
| 1.7 m NaCl-pH4              | 3291                                               | 21252                           | 240.6                    | 0.2151                                                         | 3466                                               | 50617                           | 184.3                    | 0.5122                                                         | 3579                                               | 26947                                         | 163.1                           | 0.2727                   | 98815                                                          |
| 1 m NaCl l-pH5              | 3291                                               | 23224                           | 254.5                    | 0.2352                                                         | 3466                                               | 49481                           | 191.4                    | 0.5011                                                         | 3579                                               | 26045                                         | 169.0                           | 0.2637                   | 98751                                                          |
| 3 m NaCl-pH7                | 3291                                               | 20151                           | 240.9                    | 0.2039                                                         | 3466                                               | 54730                           | 188.0                    | 0.5538                                                         | 3579                                               | 23949                                         | 163.9                           | 0.2423                   | 98830                                                          |

**Table S4:** continued

| Solution ID                       | <i>Sub-peak S-1</i>                                       |                                     |                          |                                                                     | <i>Sub-peak S-2</i>                                       |                                     |                          |                                                                     | <i>Sub-peak S-3</i>                                       |                                     |                          |                                                                     | <i>Total</i>                      |
|-----------------------------------|-----------------------------------------------------------|-------------------------------------|--------------------------|---------------------------------------------------------------------|-----------------------------------------------------------|-------------------------------------|--------------------------|---------------------------------------------------------------------|-----------------------------------------------------------|-------------------------------------|--------------------------|---------------------------------------------------------------------|-----------------------------------|
|                                   | $\nu_{\text{H}_2\text{O},\text{S-1}}$<br>cm <sup>-1</sup> | $A_{\text{H}_2\text{O},\text{S-1}}$ | FWHM<br>cm <sup>-1</sup> | $A_{\text{H}_2\text{O},\text{S-1}}/A_{\text{H}_2\text{O},\text{S}}$ | $\nu_{\text{H}_2\text{O},\text{S-2}}$<br>cm <sup>-1</sup> | $A_{\text{H}_2\text{O},\text{S-2}}$ | FWHM<br>cm <sup>-1</sup> | $A_{\text{H}_2\text{O},\text{S-2}}/A_{\text{H}_2\text{O},\text{S}}$ | $\nu_{\text{H}_2\text{O},\text{S-3}}$<br>cm <sup>-1</sup> | $A_{\text{H}_2\text{O},\text{S-3}}$ | FWHM<br>cm <sup>-1</sup> | $A_{\text{H}_2\text{O},\text{S-3}}/A_{\text{H}_2\text{O},\text{S}}$ | $A_{\text{H}_2\text{O},\text{S}}$ |
| <i>Background solutions</i>       |                                                           |                                     |                          |                                                                     |                                                           |                                     |                          |                                                                     |                                                           |                                     |                          |                                                                     |                                   |
| <b>250 °C</b>                     |                                                           |                                     |                          |                                                                     |                                                           |                                     |                          |                                                                     |                                                           |                                     |                          |                                                                     |                                   |
| MilliQ                            | 3247                                                      | 8811                                | 166.5                    | 0.0896                                                              | 3498                                                      | 78652                               | 240.6                    | 0.8001                                                              | 3571                                                      | 10840                               | 112.1                    | 0.11027                                                             | 98303                             |
| 1 m NaCl-pH2                      | 3247                                                      | 10285                               | 184.5                    | 0.1038                                                              | 3498                                                      | 83620                               | 240.3                    | 0.8437                                                              | 3571                                                      | 5201                                | 85.58                    | 0.05248                                                             | 99107                             |
| 1.7 m NaCl -pH2                   | 3247                                                      | 10248                               | 184.2                    | 0.1038                                                              | 3498                                                      | 83857                               | 237.1                    | 0.8492                                                              | 3571                                                      | 4645                                | 85.02                    | 0.04703                                                             | 98749                             |
| 1.7 m NaCl-pH4                    | 3247                                                      | 10269                               | 185.9                    | 0.1038                                                              | 3498                                                      | 83977                               | 237.8                    | 0.8491                                                              | 3571                                                      | 4656                                | 84.32                    | 0.04708                                                             | 98901                             |
| 1 m NaCl l-pH5                    | 3247                                                      | 10257                               | 184.6                    | 0.1037                                                              | 3498                                                      | 83474                               | 240.8                    | 0.8437                                                              | 3571                                                      | 5205                                | 85.92                    | 0.05261                                                             | 98936                             |
| 3 m NaCl-pH7                      | 3247                                                      | 11040                               | 195.1                    | 0.1118                                                              | 3498                                                      | 83212                               | 230.1                    | 0.8424                                                              | 3571                                                      | 4528                                | 85.00                    | 0.04584                                                             | 98781                             |
| <b>300 °C</b>                     |                                                           |                                     |                          |                                                                     |                                                           |                                     |                          |                                                                     |                                                           |                                     |                          |                                                                     |                                   |
| MilliQ                            | 3251                                                      | 6097                                | 143.2                    | 0.0624                                                              | 3501                                                      | 71050                               | 235.5                    | 0.7276                                                              | 3566                                                      | 20498                               | 114.15                   | 0.20992                                                             | 97645                             |
| 1 m NaCl-pH2                      | 3251                                                      | 6701                                | 149.4                    | 0.0681                                                              | 3501                                                      | 76600                               | 237.2                    | 0.7783                                                              | 3566                                                      | 15116                               | 104.93                   | 0.15359                                                             | 98417                             |
| 1.7 m NaCl -pH2                   | 3251                                                      | 7294                                | 158.3                    | 0.0745                                                              | 3501                                                      | 76932                               | 233.5                    | 0.7855                                                              | 3566                                                      | 13709                               | 105.11                   | 0.13998                                                             | 97935                             |
| 1.7 m NaCl-pH4                    | 3251                                                      | 7238                                | 156.8                    | 0.0737                                                              | 3501                                                      | 77645                               | 234.6                    | 0.7911                                                              | 3566                                                      | 13266                               | 102.62                   | 0.13516                                                             | 98149                             |
| 1 m NaCl l-pH5                    | 3251                                                      | 6858                                | 152.5                    | 0.0697                                                              | 3501                                                      | 76191                               | 236.2                    | 0.7743                                                              | 3566                                                      | 15351                               | 105.74                   | 0.15600                                                             | 98399                             |
| 3 m NaCl-pH7                      | 3251                                                      | 8141                                | 161.8                    | 0.0832                                                              | 3501                                                      | 79981                               | 228.9                    | 0.8171                                                              | 3566                                                      | 9762                                | 93.30                    | 0.09973                                                             | 97884                             |
| <i>Water-DyCl<sub>3</sub>-HCl</i> |                                                           |                                     |                          |                                                                     |                                                           |                                     |                          |                                                                     |                                                           |                                     |                          |                                                                     |                                   |
| <b>Ambient T</b>                  |                                                           |                                     |                          |                                                                     |                                                           |                                     |                          |                                                                     |                                                           |                                     |                          |                                                                     |                                   |
| 0.14 m DyCl <sub>3</sub> -pH2     | 3271                                                      | 56760                               | 286.7                    | 0.5713                                                              | 3446                                                      | 28591                               | 160.6                    | 0.2878                                                              | 3588                                                      | 13996                               | 151.9                    | 0.1409                                                              | 99347                             |
| 0.27 m DyCl <sub>3</sub> -pH2     | 3271                                                      | 55116                               | 286.1                    | 0.5555                                                              | 3446                                                      | 30482                               | 163.6                    | 0.3072                                                              | 3588                                                      | 13617                               | 150.9                    | 0.1372                                                              | 99215                             |
| 0.59 m DyCl <sub>3</sub> -pH2     | 3271                                                      | 51938                               | 285.5                    | 0.5242                                                              | 3446                                                      | 34641                               | 169.9                    | 0.3496                                                              | 3588                                                      | 12506                               | 149.3                    | 0.1262                                                              | 99085                             |
| 1.8 m DyCl <sub>3</sub> -pH2      | 3271                                                      | 44029                               | 290.1                    | 0.4483                                                              | 3446                                                      | 46800                               | 185.7                    | 0.4765                                                              | 3588                                                      | 7390                                | 139.2                    | 0.07524                                                             | 98219                             |
| <b>100 °C</b>                     |                                                           |                                     |                          |                                                                     |                                                           |                                     |                          |                                                                     |                                                           |                                     |                          |                                                                     |                                   |
| 0.14 m DyCl <sub>3</sub> -pH2     | 3288                                                      | 40913                               | 271.6                    | 0.4140                                                              | 3452                                                      | 36335                               | 168.1                    | 0.3677                                                              | 3584                                                      | 21578                               | 158.9                    | 0.2183                                                              | 98827                             |
| 0.27 m DyCl <sub>3</sub> -pH2     | 3288                                                      | 40802                               | 274.5                    | 0.4132                                                              | 3452                                                      | 37350                               | 170.8                    | 0.3782                                                              | 3584                                                      | 20602                               | 156.5                    | 0.2086                                                              | 98754                             |
| 0.59 m DyCl <sub>3</sub> -pH2     | 3288                                                      | 40786                               | 284.2                    | 0.4131                                                              | 3452                                                      | 38967                               | 171.8                    | 0.3947                                                              | 3584                                                      | 18972                               | 156.7                    | 0.1922                                                              | 98725                             |
| 1.8 m DyCl <sub>3</sub> -pH2      | 3288                                                      | 42760                               | 312.7                    | 0.4339                                                              | 3452                                                      | 43929                               | 180.4                    | 0.4457                                                              | 3584                                                      | 11865                               | 151.3                    | 0.1204                                                              | 98553                             |
| <b>150 °C</b>                     |                                                           |                                     |                          |                                                                     |                                                           |                                     |                          |                                                                     |                                                           |                                     |                          |                                                                     |                                   |
| 0.14 m DyCl <sub>3</sub> -pH2     | 3293                                                      | 33357                               | 266.8                    | 0.3385                                                              | 3453                                                      | 38115                               | 168.3                    | 0.3867                                                              | 3578                                                      | 27084                               | 163.2                    | 0.2748                                                              | 98556                             |
| 0.27 m DyCl <sub>3</sub> -pH2     | 3293                                                      | 31907                               | 267.2                    | 0.3235                                                              | 3453                                                      | 39442                               | 169.5                    | 0.3999                                                              | 3578                                                      | 27285                               | 161.0                    | 0.2766                                                              | 98633                             |
| 0.59 m DyCl <sub>3</sub> -pH2     | 3293                                                      | 33352                               | 282.1                    | 0.3380                                                              | 3453                                                      | 40439                               | 171.0                    | 0.4098                                                              | 3578                                                      | 24881                               | 161.1                    | 0.2522                                                              | 98672                             |
| 1.8 m DyCl <sub>3</sub> -pH2      | 3293                                                      | 40315                               | 322.6                    | 0.4079                                                              | 3453                                                      | 42504                               | 176.2                    | 0.4300                                                              | 3578                                                      | 16018                               | 154.6                    | 0.1621                                                              | 98836                             |

**Table S4:** continued

| Solution ID                       | <i>Sub-peak S-1</i>                                       |                                     |                          |                                                                     | <i>Sub-peak S-2</i>                                       |                                     |                          |                                                                     | <i>Sub-peak S-3</i>                                       |                                     |                          |                                                                     | <i>Total</i>                      |
|-----------------------------------|-----------------------------------------------------------|-------------------------------------|--------------------------|---------------------------------------------------------------------|-----------------------------------------------------------|-------------------------------------|--------------------------|---------------------------------------------------------------------|-----------------------------------------------------------|-------------------------------------|--------------------------|---------------------------------------------------------------------|-----------------------------------|
|                                   | $\nu_{\text{H}_2\text{O},\text{S-1}}$<br>cm <sup>-1</sup> | $A_{\text{H}_2\text{O},\text{S-1}}$ | FWHM<br>cm <sup>-1</sup> | $A_{\text{H}_2\text{O},\text{S-1}}/A_{\text{H}_2\text{O},\text{S}}$ | $\nu_{\text{H}_2\text{O},\text{S-2}}$<br>cm <sup>-1</sup> | $A_{\text{H}_2\text{O},\text{S-2}}$ | FWHM<br>cm <sup>-1</sup> | $A_{\text{H}_2\text{O},\text{S-2}}/A_{\text{H}_2\text{O},\text{S}}$ | $\nu_{\text{H}_2\text{O},\text{S-3}}$<br>cm <sup>-1</sup> | $A_{\text{H}_2\text{O},\text{S-3}}$ | FWHM<br>cm <sup>-1</sup> | $A_{\text{H}_2\text{O},\text{S-3}}/A_{\text{H}_2\text{O},\text{S}}$ | $A_{\text{H}_2\text{O},\text{S}}$ |
| <i>Water-DyCl<sub>3</sub>-HCl</i> |                                                           |                                     |                          |                                                                     |                                                           |                                     |                          |                                                                     |                                                           |                                     |                          |                                                                     |                                   |
| <b>200 °C</b>                     |                                                           |                                     |                          |                                                                     |                                                           |                                     |                          |                                                                     |                                                           |                                     |                          |                                                                     |                                   |
| 0.14 m DyCl <sub>3</sub> -pH2     | 3291                                                      | 24825                               | 262.3                    | 0.2518                                                              | 3466                                                      | 45610                               | 184.8                    | 0.4626                                                              | 3579                                                      | 28166                               | 166.2                    | 0.2857                                                              | 98601                             |
| 0.27 m DyCl <sub>3</sub> -pH2     | 3291                                                      | 23953                               | 263.1                    | 0.2431                                                              | 3466                                                      | 46749                               | 186.9                    | 0.4744                                                              | 3579                                                      | 27836                               | 163.0                    | 0.2825                                                              | 98538                             |
| 0.59 m DyCl <sub>3</sub> -pH2     | 3291                                                      | 27424                               | 276.7                    | 0.2781                                                              | 3466                                                      | 47553                               | 188.3                    | 0.4822                                                              | 3579                                                      | 23633                               | 169.3                    | 0.2397                                                              | 98611                             |
| 1.8 m DyCl <sub>3</sub> -pH2      | 3291                                                      | 35638                               | 327.3                    | 0.3616                                                              | 3466                                                      | 47890                               | 192.1                    | 0.4859                                                              | 3579                                                      | 15039                               | 162.7                    | 0.15257                                                             | 98567                             |
| <b>250 °C</b>                     |                                                           |                                     |                          |                                                                     |                                                           |                                     |                          |                                                                     |                                                           |                                     |                          |                                                                     |                                   |
| 0.14 m DyCl <sub>3</sub> -pH2     | 3247                                                      | 10261                               | 183.7                    | 0.1045                                                              | 3498                                                      | 78961                               | 238.6                    | 0.8041                                                              | 3571                                                      | 8981                                | 106.31                   | 0.09145                                                             | 98202                             |
| 0.27 m DyCl <sub>3</sub> -pH2     | 3247                                                      | 10966                               | 193.0                    | 0.1116                                                              | 3498                                                      | 79249                               | 240.5                    | 0.8066                                                              | 3571                                                      | 8035                                | 98.10                    | 0.08178                                                             | 98250                             |
| 0.59 m DyCl <sub>3</sub> -pH2     | 3247                                                      | 14257                               | 228.1                    | 0.1448                                                              | 3498                                                      | 78945                               | 236.9                    | 0.8019                                                              | 3571                                                      | 5243                                | 85.40                    | 0.05326                                                             | 98445                             |
| 1.8 m DyCl <sub>3</sub> -pH2      | 3247                                                      | 25113                               | 293.3                    | 0.2524                                                              | 3498                                                      | 74026                               | 227.8                    | 0.7440                                                              | 3571                                                      | 360                                 | 38.0                     | 0.00362                                                             | 99499                             |
| <b>300 °C</b>                     |                                                           |                                     |                          |                                                                     |                                                           |                                     |                          |                                                                     |                                                           |                                     |                          |                                                                     |                                   |
| 0.14 m DyCl <sub>3</sub> -pH2     | 3251                                                      | 6233                                | 149.8                    | 0.0642                                                              | 3501                                                      | 68645                               | 237.8                    | 0.7073                                                              | 3566                                                      | 22169                               | 115.95                   | 0.2284                                                              | 97047                             |
| 0.27 m DyCl <sub>3</sub> -pH2     | 3251                                                      | 7913                                | 168.0                    | 0.0811                                                              | 3501                                                      | 73109                               | 234.7                    | 0.7492                                                              | 3566                                                      | 16564                               | 105.24                   | 0.1697                                                              | 97586                             |
| 0.59 m DyCl <sub>3</sub> -pH2     | 3251                                                      | 9520                                | 193.7                    | 0.0976                                                              | 3501                                                      | 71749                               | 233.7                    | 0.7353                                                              | 3566                                                      | 16304                               | 105.35                   | 0.1671                                                              | 97574                             |
| 1.8 m DyCl <sub>3</sub> -pH2      | 3251                                                      | 20103                               | 273.6                    | 0.2053                                                              | 3501                                                      | 72271                               | 220.7                    | 0.7379                                                              | 3566                                                      | 5566                                | 85.06                    | 0.0568                                                              | 97940                             |

Symbols:  $\nu_{\text{H}_2\text{O},\text{S-1}}$  to  $\nu_{\text{H}_2\text{O},\text{S-3}}$  = peak center positions of sub-peaks S-1 to S-3 of the water stretching band;  $A_{\text{H}_2\text{O},\text{S-1}}$  to  $A_{\text{H}_2\text{O},\text{S-3}}$  = peak areas of sub-peaks S-1 to S-3 of the water stretching band;  $A_{\text{H}_2\text{O},\text{S}}$  = total peak area of the water stretching band;  $A_{\text{H}_2\text{O},\text{S-1}}/A_{\text{H}_2\text{O},\text{S}}$  to  $A_{\text{H}_2\text{O},\text{S-3}}/A_{\text{H}_2\text{O},\text{S}}$  = ratios of peak areas of sub-peaks S-1 to S-3 to the total peak area of the water stretching band.

**Table S5:** Peak center positions, peak areas, and FWHM for Raman modes in the region of 200-400  $\text{cm}^{-1}$  in  $\text{DyCl}_3$ -bearing solutions.

|                                    | <b>Dy-O</b>                               |                       |                          |                         | <b>Dy-Cl</b>                             |                    |                          |
|------------------------------------|-------------------------------------------|-----------------------|--------------------------|-------------------------|------------------------------------------|--------------------|--------------------------|
|                                    | $\nu_{1,\text{Dy-O}}$<br>$\text{cm}^{-1}$ | $A_{\text{Dy-O,raw}}$ | FWHM<br>$\text{cm}^{-1}$ | $A_{\text{Dy-O,corr.}}$ | $\nu_{\text{Dy-Cl}}$<br>$\text{cm}^{-1}$ | $A_{\text{Dy-Cl}}$ | FWHM<br>$\text{cm}^{-1}$ |
| <b>Ambient T</b>                   |                                           |                       |                          |                         |                                          |                    |                          |
| 0.14 <i>m</i> $\text{DyCl}_3$ -pH2 | 384.3                                     | 1.533                 | 38.20                    | -                       | -                                        | -                  | -                        |
| 0.27 <i>m</i> $\text{DyCl}_3$ -pH2 | 381.4                                     | 2.711                 | 46.34                    | -                       | -                                        | -                  | -                        |
| 0.59 <i>m</i> $\text{DyCl}_3$ -pH2 | 378.6                                     | 5.399                 | 44.89                    | -                       | -                                        | -                  | -                        |
| 1.8 <i>m</i> $\text{DyCl}_3$ -pH2  | 378.0                                     | 12.80                 | 43.97                    | -                       | -                                        | -                  | -                        |
| <b>100 °C</b>                      |                                           |                       |                          |                         |                                          |                    |                          |
| 0.14 <i>m</i> $\text{DyCl}_3$ -pH2 | 374.0                                     | 1.786                 | 32.00                    | 0.5677                  | -                                        | -                  | -                        |
| 0.27 <i>m</i> $\text{DyCl}_3$ -pH2 | 372.8                                     | 3.188                 | 39.73                    | 1.970                   | 236.5                                    | 0.5215             | 32.70                    |
| 0.59 <i>m</i> $\text{DyCl}_3$ -pH2 | 373.3                                     | 5.640                 | 46.55                    | 4.422                   | 239.0                                    | 0.7784             | 27.64                    |
| 1.8 <i>m</i> $\text{DyCl}_3$ -pH2  | 372.7                                     | 11.88                 | 44.27                    | 10.66                   | 240.8                                    | 2.683              | 31.02                    |
| <b>150 °C</b>                      |                                           |                       |                          |                         |                                          |                    |                          |
| 0.14 <i>m</i> $\text{DyCl}_3$ -pH2 | 368.7                                     | 1.665                 | 29.74                    | 0.1865                  | -                                        | -                  | -                        |
| 0.27 <i>m</i> $\text{DyCl}_3$ -pH2 | 370.7                                     | 3.212                 | 41.37                    | 1.734                   | 239.5                                    | 0.4825             | 26.23                    |
| 0.59 <i>m</i> $\text{DyCl}_3$ -pH2 | 370.6                                     | 5.114                 | 45.67                    | 3.635                   | 238.4                                    | 1.000              | 32.39                    |
| 1.8 <i>m</i> $\text{DyCl}_3$ -pH2  | 370.3                                     | 10.95                 | 42.99                    | 9.473                   | 240.4                                    | 3.838              | 32.85                    |
| <b>200 °C</b>                      |                                           |                       |                          |                         |                                          |                    |                          |
| 0.14 <i>m</i> $\text{DyCl}_3$ -pH2 | 367.8                                     | 2.214                 | 43.15                    | 0.5546                  | 240.7                                    | 0.6008             | 28.64                    |
| 0.27 <i>m</i> $\text{DyCl}_3$ -pH2 | 370.3                                     | 2.958                 | 40.15                    | 1.299                   | 238.5                                    | 0.9373             | 29.44                    |
| 0.59 <i>m</i> $\text{DyCl}_3$ -pH2 | 367.6                                     | 4.901                 | 43.25                    | 3.242                   | 238.1                                    | 1.780              | 32.43                    |
| 1.8 <i>m</i> $\text{DyCl}_3$ -pH2  | 367.1                                     | 9.666                 | 41.94                    | 8.006                   | 237.0                                    | 6.612              | 40.26                    |
| <b>250 °C</b>                      |                                           |                       |                          |                         |                                          |                    |                          |
| 0.14 <i>m</i> $\text{DyCl}_3$ -pH2 | 369.6                                     | 2.329                 | 29.36                    | 0.4363                  | 237.7                                    | 0.9141             | 28.52                    |
| 0.27 <i>m</i> $\text{DyCl}_3$ -pH2 | 367.6                                     | 2.811                 | 51.35                    | 0.9192                  | 238.5                                    | 1.559              | 33.14                    |
| 0.59 <i>m</i> $\text{DyCl}_3$ -pH2 | 367.6                                     | 4.665                 | 44.80                    | 2.773                   | 239.0                                    | 3.283              | 42.07                    |
| 1.8 <i>m</i> $\text{DyCl}_3$ -pH2  | 366.1                                     | 8.056                 | 41.74                    | 6.164                   | 239.3                                    | 12.05              | 39.18                    |
| <b>300 °C</b>                      |                                           |                       |                          |                         |                                          |                    |                          |
| 0.14 <i>m</i> $\text{DyCl}_3$ -pH2 | 370.0                                     | 2.697                 | 36.05                    | 0.8882                  | 241.0                                    | 1.589              | 37.00                    |
| 0.27 <i>m</i> $\text{DyCl}_3$ -pH2 | 369.3                                     | 2.911                 | 37.36                    | 1.101                   | 242.1                                    | 3.047              | 29.21                    |
| 0.59 <i>m</i> $\text{DyCl}_3$ -pH2 | 365.5                                     | 4.516                 | 47.81                    | 2.707                   | 243.7                                    | 7.601              | 40.16                    |
| 1.8 <i>m</i> $\text{DyCl}_3$ -pH2  | 365.3                                     | 6.151                 | 41.25                    | 4.342                   | 244.5                                    | 26.16              | 42.29                    |

Symbols:  $\nu_{1,\text{Dy-O}}$  = peak center position of the main stretching vibration of the Dy-O bond;  $\nu_{\text{Dy-Cl}}$  = peak center position of the main stretching vibration of the Dy-Cl bond;  $A_{\nu_{1,\text{Dy-O,raw}}}$  = uncorrected peak area of the Dy-O mode;  $A_{\nu_{1,\text{Dy-O,corr.}}}$  = peak area of the Dy-O mode corrected using the average peak areas of  $\nu_{\text{H}_2\text{O,L-1}}$  reported in Table S3;  $A_{\text{Dy-Cl}}$  = peak area of the Dy-Cl mode. Italic notation: high uncertainty, excluded from evaluation of speciation.

**Table S6:** Thermodynamic data for solid and aqueous species included in calculations of aqueous Dy speciation.

| <i>Solids</i>           | $\Delta_f G^\circ$<br>(J·mol <sup>-1</sup> ) | $\Delta_f H^\circ$<br>(J·mol <sup>-1</sup> ) | $S^\circ$<br>(J·K <sup>-1</sup> ·mol <sup>-1</sup> ) | $V^\circ$<br>(J·bar <sup>-1</sup> ) | $C_p^\circ$<br>(J·K <sup>-1</sup> ·mol <sup>-1</sup> ) | $a_0$<br>(J·K <sup>-1</sup> ·mol <sup>-1</sup> ) | $a_1 \times 10^4$<br>(J·K <sup>-2</sup> ·mol <sup>-1</sup> ) | $a_2 \times 10^{-3}$<br>(J·K·mol <sup>-1</sup> ) | $a_3 \times 10^{-2}$<br>(J·mol <sup>-1</sup> ) |  |  |  | Refs |
|-------------------------|----------------------------------------------|----------------------------------------------|------------------------------------------------------|-------------------------------------|--------------------------------------------------------|--------------------------------------------------|--------------------------------------------------------------|--------------------------------------------------|------------------------------------------------|--|--|--|------|
| Dy(OH) <sub>3</sub> (s) | -1,294,800                                   | -1,428,400                                   | 130.3                                                | 3.5493                              | 114.05                                                 | 174.60                                           | 122.88                                                       | 1,137.2                                          | -229.6                                         |  |  |  | (a)  |

  

| <i>Aqueous species</i>          | $\Delta_f G^\circ$<br>(J·mol <sup>-1</sup> ) | $\Delta_f H^\circ$<br>(J·mol <sup>-1</sup> ) | $S^\circ$<br>(J·K <sup>-1</sup> ·mol <sup>-1</sup> ) | $V^\circ$<br>(J·bar <sup>-1</sup> ) | $C_p^\circ$<br>(J·K <sup>-1</sup> ·mol <sup>-1</sup> ) | $a_1$<br>(cal·bar <sup>-1</sup> ·mol <sup>-1</sup> ) | $a_2$<br>(cal·mol <sup>-1</sup> ) | $a_3$<br>(cal·K·bar <sup>-1</sup> ·mol <sup>-1</sup> ) | $a_4$<br>(cal·K·mol <sup>-1</sup> ) | $c_1$<br>(cal·K <sup>-1</sup> ·mol <sup>-1</sup> ) | $c_2$<br>(cal·K·mol <sup>-1</sup> ) | $w_0$<br>(cal·mol <sup>-1</sup> ) |       |
|---------------------------------|----------------------------------------------|----------------------------------------------|------------------------------------------------------|-------------------------------------|--------------------------------------------------------|------------------------------------------------------|-----------------------------------|--------------------------------------------------------|-------------------------------------|----------------------------------------------------|-------------------------------------|-----------------------------------|-------|
| Dy <sup>3+</sup>                | -664,001                                     | -696,711                                     | -231.0                                               | -4.1428                             | -131.61                                                | -0.30003                                             | -1,510.74                         | 11.6879                                                | -21,545                             | 9.5076                                             | -99,419                             | 237,920                           | (b,c) |
| DyCl <sup>2+</sup>              | 799,270                                      | -866,777                                     | -170.8                                               | -1.990                              | 146.0                                                  | -0.03106                                             | -853.96                           | 9.1065                                                 | -24260                              | 42.1744                                            | 40696                               | 170640                            | (d)   |
| DyCl <sub>2</sub> <sup>+</sup>  | -929,057                                     | -1,020,000                                   | -72.51                                               | 0.413                               | 67.24                                                  | 0.26363                                              | -134.44                           | 6.2785                                                 | -27234                              | 22.9371                                            | 2368                                | 80650                             | (d)   |
| DyOH <sup>2+</sup>              | -856,465                                     | -903,493                                     | -45.6                                                | 0.2827                              | -103.24                                                | 0.26154                                              | -139.41                           | 6.2950                                                 | -27,213                             | 2.8769                                             | -80,863                             | 122,060                           | (e)   |
| DyO <sup>+</sup>                | -809,186                                     | -836,884                                     | 19.3                                                 | 0.5453                              | -276.36                                                | 0.26935                                              | -120.56                           | 6.2255                                                 | -27,291                             | -28.1511                                           | -164,991                            | 47,990                            | (e)   |
| DyO <sub>2</sub> H <sup>0</sup> | -996,629                                     | -1,050,602                                   | 163.6                                                | 2.151                               | -473.22                                                | 0.46969                                              | 368.55                            | 4.3051                                                 | -29,313                             | -60.3933                                           | -260,730                            | -3,000                            | (e)   |
| HCl <sup>0</sup>                | -127,240                                     | -179,450                                     | 1.76                                                 | 1.638                               | 149.2                                                  | 1.61573                                              | -1143.11                          | -46.1866                                               | -23036.4                            | 46.4716                                            | -52811                              | 0.0                               | (f)   |
| Cl <sup>-</sup>                 | -131,290                                     | -167,080                                     | 56.74                                                | 1.734                               | -122.5                                                 | 0.40320                                              | 480.10                            | 5.5630                                                 | -28470                              | -4.40                                              | -57140                              | 14560                             | (c)   |
| OH <sup>-</sup>                 | -157,297                                     | -230,024                                     | -10.7                                                | -0.4708                             | -136.34                                                | 0.12527                                              | 7.38                              | 1.8423                                                 | -27,821                             | 4.15000                                            | -103,460                            | 172,460                           | (c)   |
| H <sup>+</sup>                  | 0                                            | 0                                            | 0                                                    | 0                                   | 0                                                      | 0                                                    | 0                                 | 0                                                      | 0                                   | 0                                                  | 0                                   | -                                 | (c)   |
| H <sub>2</sub> O <sup>0</sup>   | -237183                                      | -285881                                      | 69.9                                                 | 1.8068                              | 75.36                                                  | -                                                    | -                                 | -                                                      | -                                   | -                                                  | -                                   | -                                 | (g)   |

(a) Diakonov et al.<sup>15</sup>,  $C_p$  estimated from the data for Tb(OH)<sub>3</sub>; (b) Shock et al.<sup>16</sup>; (c) Shock and Helgeson<sup>4</sup>; (d) Migdisov et al.<sup>17</sup>; (e) Haas et al.<sup>18</sup>; (f) Tagirov et al.<sup>19</sup>; (g) IAPS-84 equation-of-state<sup>7</sup>.

**Table S7:** Aqueous speciation calculations using GEM-Selektor and the composition of the 0.14 mol/kg DyCl<sub>3</sub> experimental solution (Table 1). Listed are the calculated pH values at temperature T, the concentrations of aqueous Dy species and the combined concentration of Dy chloride complexes (Dy-Cl) used to plot Figure 8A, and the ratio of Dy chloride species to the Dy<sup>3+</sup> aqua ion (Dy-Cl/Dy<sup>3+</sup>) used in Figure 10.

| T   | pH    | Dy <sup>3+</sup>       | DyCl <sup>2+</sup>     | DyCl <sub>2</sub> <sup>+</sup> | DyOH <sup>2+</sup>     | Dy(OH) <sub>2</sub> <sup>+</sup> | Dy(OH) <sub>3</sub> <sup>0</sup> | Dy-Cl complexes        | Dy-Cl/Dy <sup>3+</sup> |
|-----|-------|------------------------|------------------------|--------------------------------|------------------------|----------------------------------|----------------------------------|------------------------|------------------------|
| °C  |       | mol/kg                 | mol/kg                 | mol/kg                         | mol/kg                 | mol/kg                           | mol/kg                           | mol/kg                 |                        |
| 25  | 2.141 | 1.270x10 <sup>-1</sup> | 1.448x10 <sup>-2</sup> | 4.969x10 <sup>-4</sup>         | 2.045x10 <sup>-8</sup> | 3.237x10 <sup>-15</sup>          | 5.850x10 <sup>-22</sup>          | 1.498x10 <sup>-2</sup> | 0.1180                 |
| 30  | 2.139 | 1.274x10 <sup>-1</sup> | 1.409x10 <sup>-2</sup> | 5.261x10 <sup>-4</sup>         | 3.388x10 <sup>-8</sup> | 8.209x10 <sup>-15</sup>          | 2.377x10 <sup>-21</sup>          | 1.462x10 <sup>-2</sup> | 0.1147                 |
| 35  | 2.138 | 1.276x10 <sup>-1</sup> | 1.384x10 <sup>-2</sup> | 5.599x10 <sup>-4</sup>         | 5.506x10 <sup>-8</sup> | 2.005x10 <sup>-14</sup>          | 9.087x10 <sup>-21</sup>          | 1.440x10 <sup>-2</sup> | 0.1129                 |
| 40  | 2.138 | 1.277x10 <sup>-1</sup> | 1.371x10 <sup>-2</sup> | 5.994x10 <sup>-4</sup>         | 8.803x10 <sup>-8</sup> | 4.725x10 <sup>-14</sup>          | 3.280x10 <sup>-20</sup>          | 1.431x10 <sup>-2</sup> | 0.1121                 |
| 45  | 2.138 | 1.277x10 <sup>-1</sup> | 1.369x10 <sup>-2</sup> | 6.444x10 <sup>-4</sup>         | 1.382x10 <sup>-7</sup> | 1.077x10 <sup>-13</sup>          | 1.122x10 <sup>-19</sup>          | 1.434x10 <sup>-2</sup> | 0.1123                 |
| 50  | 2.138 | 1.275x10 <sup>-1</sup> | 1.376x10 <sup>-2</sup> | 6.956x10 <sup>-4</sup>         | 2.133x10 <sup>-7</sup> | 2.376x10 <sup>-13</sup>          | 3.643x10 <sup>-19</sup>          | 1.446x10 <sup>-2</sup> | 0.1134                 |
| 55  | 2.139 | 1.273x10 <sup>-1</sup> | 1.392x10 <sup>-2</sup> | 7.535x10 <sup>-4</sup>         | 3.244x10 <sup>-7</sup> | 5.086x10 <sup>-13</sup>          | 1.127x10 <sup>-18</sup>          | 1.467x10 <sup>-2</sup> | 0.1152                 |
| 60  | 2.140 | 1.270x10 <sup>-1</sup> | 1.416x10 <sup>-2</sup> | 8.189x10 <sup>-4</sup>         | 4.856x10 <sup>-7</sup> | 1.058x10 <sup>-12</sup>          | 3.329x10 <sup>-18</sup>          | 1.498x10 <sup>-2</sup> | 0.1179                 |
| 65  | 2.142 | 1.266x10 <sup>-1</sup> | 1.447x10 <sup>-2</sup> | 8.925x10 <sup>-4</sup>         | 7.167x10 <sup>-7</sup> | 2.139x10 <sup>-12</sup>          | 9.413x10 <sup>-18</sup>          | 1.537x10 <sup>-2</sup> | 0.1214                 |
| 70  | 2.143 | 1.262x10 <sup>-1</sup> | 1.487x10 <sup>-2</sup> | 9.748x10 <sup>-4</sup>         | 1.043x10 <sup>-6</sup> | 4.215x10 <sup>-12</sup>          | 2.553x10 <sup>-17</sup>          | 1.584x10 <sup>-2</sup> | 0.1256                 |
| 75  | 2.145 | 1.256x10 <sup>-1</sup> | 1.534x10 <sup>-2</sup> | 1.067x10 <sup>-3</sup>         | 1.498x10 <sup>-6</sup> | 8.094x10 <sup>-12</sup>          | 6.657x10 <sup>-17</sup>          | 1.640x10 <sup>-2</sup> | 0.1306                 |
| 80  | 2.148 | 1.250x10 <sup>-1</sup> | 1.588x10 <sup>-2</sup> | 1.171x10 <sup>-3</sup>         | 2.124x10 <sup>-6</sup> | 1.519x10 <sup>-11</sup>          | 1.671x10 <sup>-16</sup>          | 1.705x10 <sup>-2</sup> | 0.1364                 |
| 85  | 2.150 | 1.242x10 <sup>-1</sup> | 1.649x10 <sup>-2</sup> | 1.286x10 <sup>-3</sup>         | 2.975x10 <sup>-6</sup> | 2.786x10 <sup>-11</sup>          | 4.049x10 <sup>-16</sup>          | 1.778x10 <sup>-2</sup> | 0.1431                 |
| 90  | 2.153 | 1.234x10 <sup>-1</sup> | 1.719x10 <sup>-2</sup> | 1.415x10 <sup>-3</sup>         | 4.120x10 <sup>-6</sup> | 4.998x10 <sup>-11</sup>          | 9.478x10 <sup>-16</sup>          | 1.861x10 <sup>-2</sup> | 0.1508                 |
| 95  | 2.156 | 1.225x10 <sup>-1</sup> | 1.797x10 <sup>-2</sup> | 1.559x10 <sup>-3</sup>         | 5.640x10 <sup>-6</sup> | 8.786x10 <sup>-11</sup>          | 2.147x10 <sup>-15</sup>          | 1.952x10 <sup>-2</sup> | 0.1594                 |
| 100 | 2.159 | 1.214x10 <sup>-1</sup> | 1.882x10 <sup>-2</sup> | 1.719x10 <sup>-3</sup>         | 7.636x10 <sup>-6</sup> | 1.512x10 <sup>-10</sup>          | 4.716x10 <sup>-15</sup>          | 2.054x10 <sup>-2</sup> | 0.1691                 |
| 105 | 2.162 | 1.203x10 <sup>-1</sup> | 1.977x10 <sup>-2</sup> | 1.898x10 <sup>-3</sup>         | 1.023x10 <sup>-5</sup> | 2.555x10 <sup>-10</sup>          | 1.005x10 <sup>-14</sup>          | 2.166x10 <sup>-2</sup> | 0.1800                 |
| 110 | 2.166 | 1.191x10 <sup>-1</sup> | 2.079x10 <sup>-2</sup> | 2.096x10 <sup>-3</sup>         | 1.357x10 <sup>-5</sup> | 4.237x10 <sup>-10</sup>          | 2.083x10 <sup>-14</sup>          | 2.289x10 <sup>-2</sup> | 0.1922                 |
| 115 | 2.170 | 1.177x10 <sup>-1</sup> | 2.192x10 <sup>-2</sup> | 2.317x10 <sup>-3</sup>         | 1.783x10 <sup>-5</sup> | 6.903x10 <sup>-10</sup>          | 4.199x10 <sup>-14</sup>          | 2.423x10 <sup>-2</sup> | 0.2058                 |
| 120 | 2.173 | 1.163x10 <sup>-1</sup> | 2.313x10 <sup>-2</sup> | 2.563x10 <sup>-3</sup>         | 2.318x10 <sup>-5</sup> | 1.106x10 <sup>-9</sup>           | 8.246x10 <sup>-14</sup>          | 2.570x10 <sup>-2</sup> | 0.2210                 |
| 125 | 2.177 | 1.147x10 <sup>-1</sup> | 2.444x10 <sup>-2</sup> | 2.834x10 <sup>-3</sup>         | 2.988x10 <sup>-5</sup> | 1.742x10 <sup>-9</sup>           | 1.579x10 <sup>-13</sup>          | 2.728x10 <sup>-2</sup> | 0.2378                 |
| 130 | 2.181 | 1.130x10 <sup>-1</sup> | 2.586x10 <sup>-2</sup> | 3.135x10 <sup>-3</sup>         | 3.816x10 <sup>-5</sup> | 2.702x10 <sup>-9</sup>           | 2.951x10 <sup>-13</sup>          | 2.899x10 <sup>-2</sup> | 0.2567                 |
| 135 | 2.186 | 1.111x10 <sup>-1</sup> | 2.738x10 <sup>-2</sup> | 3.470x10 <sup>-3</sup>         | 4.827x10 <sup>-5</sup> | 4.127x10 <sup>-9</sup>           | 5.390x10 <sup>-13</sup>          | 3.085x10 <sup>-2</sup> | 0.2777                 |
| 140 | 2.190 | 1.091x10 <sup>-1</sup> | 2.900x10 <sup>-2</sup> | 3.839x10 <sup>-3</sup>         | 6.064x10 <sup>-5</sup> | 6.211x10 <sup>-9</sup>           | 9.624x10 <sup>-13</sup>          | 3.284x10 <sup>-2</sup> | 0.3010                 |
| 145 | 2.194 | 1.069x10 <sup>-1</sup> | 3.073x10 <sup>-2</sup> | 4.246x10 <sup>-3</sup>         | 7.548x10 <sup>-5</sup> | 9.210x10 <sup>-9</sup>           | 1.681x10 <sup>-12</sup>          | 3.498x10 <sup>-2</sup> | 0.3270                 |
| 150 | 2.199 | 1.046x10 <sup>-1</sup> | 3.257x10 <sup>-2</sup> | 4.695x10 <sup>-3</sup>         | 9.316x10 <sup>-5</sup> | 1.347x10 <sup>-8</sup>           | 2.877x10 <sup>-12</sup>          | 3.726x10 <sup>-2</sup> | 0.3561                 |
| 155 | 2.204 | 1.022x10 <sup>-1</sup> | 3.452x10 <sup>-2</sup> | 5.190x10 <sup>-3</sup>         | 1.140x10 <sup>-4</sup> | 1.943x10 <sup>-8</sup>           | 4.824x10 <sup>-12</sup>          | 3.971x10 <sup>-2</sup> | 0.3886                 |
| 160 | 2.208 | 9.956x10 <sup>-2</sup> | 3.657x10 <sup>-2</sup> | 5.733x10 <sup>-3</sup>         | 1.385x10 <sup>-4</sup> | 2.768x10 <sup>-8</sup>           | 7.927x10 <sup>-12</sup>          | 4.231x10 <sup>-2</sup> | 0.4250                 |
| 165 | 2.213 | 9.678x10 <sup>-2</sup> | 3.873x10 <sup>-2</sup> | 6.329x10 <sup>-3</sup>         | 1.668x10 <sup>-4</sup> | 3.890x10 <sup>-8</sup>           | 1.279x10 <sup>-11</sup>          | 4.506x10 <sup>-2</sup> | 0.4656                 |
| 170 | 2.218 | 9.383x10 <sup>-2</sup> | 4.099x10 <sup>-2</sup> | 6.980x10 <sup>-3</sup>         | 1.994x10 <sup>-4</sup> | 5.396x10 <sup>-8</sup>           | 2.023x10 <sup>-11</sup>          | 4.797x10 <sup>-2</sup> | 0.5112                 |
| 175 | 2.222 | 9.074x10 <sup>-2</sup> | 4.333x10 <sup>-2</sup> | 7.690x10 <sup>-3</sup>         | 2.364x10 <sup>-4</sup> | 7.396x10 <sup>-8</sup>           | 3.148x10 <sup>-11</sup>          | 5.102x10 <sup>-2</sup> | 0.5623                 |
| 180 | 2.227 | 8.750x10 <sup>-2</sup> | 4.576x10 <sup>-2</sup> | 8.463x10 <sup>-3</sup>         | 2.780x10 <sup>-4</sup> | 1.001x10 <sup>-7</sup>           | 4.806x10 <sup>-11</sup>          | 5.422x10 <sup>-2</sup> | 0.6196                 |
| 185 | 2.232 | 8.412x10 <sup>-2</sup> | 4.826x10 <sup>-2</sup> | 9.301x10 <sup>-3</sup>         | 3.244x10 <sup>-4</sup> | 1.339x10 <sup>-7</sup>           | 7.216x10 <sup>-11</sup>          | 5.756x10 <sup>-2</sup> | 0.6843                 |
| 190 | 2.237 | 8.059x10 <sup>-2</sup> | 5.082x10 <sup>-2</sup> | 1.021x10 <sup>-2</sup>         | 3.756x10 <sup>-4</sup> | 1.770x10 <sup>-7</sup>           | 1.066x10 <sup>-10</sup>          | 6.103x10 <sup>-2</sup> | 0.7573                 |
| 195 | 2.242 | 7.694x10 <sup>-2</sup> | 5.343x10 <sup>-2</sup> | 1.120x10 <sup>-2</sup>         | 4.316x10 <sup>-4</sup> | 2.313x10 <sup>-7</sup>           | 1.549x10 <sup>-10</sup>          | 6.462x10 <sup>-2</sup> | 0.8399                 |

**Table S7:** continued

| T   | pH    | Dy <sup>3+</sup>       | DyCl <sup>2+</sup>     | DyCl <sub>2</sub> <sup>+</sup> | DyOH <sup>2+</sup>     | Dy(OH) <sub>2</sub> <sup>+</sup> | Dy(OH) <sub>3</sub> <sup>0</sup> | Dy-Cl complexes        | Dy-Cl/Dy <sup>3+</sup> |
|-----|-------|------------------------|------------------------|--------------------------------|------------------------|----------------------------------|----------------------------------|------------------------|------------------------|
| °C  |       | mol/kg                 | mol/kg                 | mol/kg                         | mol/kg                 | mol/kg                           | mol/kg                           | mol/kg                 |                        |
| 200 | 2.247 | 7.319x10 <sup>-2</sup> | 5.606x10 <sup>-2</sup> | 1.226x10 <sup>-2</sup>         | 4.919x10 <sup>-4</sup> | 2.989x10 <sup>-7</sup>           | 2.217x10 <sup>-10</sup>          | 6.831x10 <sup>-2</sup> | 0.9333                 |
| 205 | 2.253 | 6.936x10 <sup>-2</sup> | 5.869x10 <sup>-2</sup> | 1.340x10 <sup>-2</sup>         | 5.563x10 <sup>-4</sup> | 3.819x10 <sup>-7</sup>           | 3.125x10 <sup>-10</sup>          | 7.208x10 <sup>-2</sup> | 1.039                  |
| 210 | 2.258 | 6.545x10 <sup>-2</sup> | 6.131x10 <sup>-2</sup> | 1.462x10 <sup>-2</sup>         | 6.244x10 <sup>-4</sup> | 4.829x10 <sup>-7</sup>           | 4.343x10 <sup>-10</sup>          | 7.593x10 <sup>-2</sup> | 1.160                  |
| 215 | 2.264 | 6.149x10 <sup>-2</sup> | 6.388x10 <sup>-2</sup> | 1.593x10 <sup>-2</sup>         | 6.954x10 <sup>-4</sup> | 6.042x10 <sup>-7</sup>           | 5.954x10 <sup>-10</sup>          | 7.981x10 <sup>-2</sup> | 1.298                  |
| 220 | 2.270 | 5.752x10 <sup>-2</sup> | 6.639x10 <sup>-2</sup> | 1.732x10 <sup>-2</sup>         | 7.685x10 <sup>-4</sup> | 7.484x10 <sup>-7</sup>           | 8.057x10 <sup>-10</sup>          | 8.371x10 <sup>-2</sup> | 1.455                  |
| 225 | 2.276 | 5.354x10 <sup>-2</sup> | 6.880x10 <sup>-2</sup> | 1.881x10 <sup>-2</sup>         | 8.429x10 <sup>-4</sup> | 9.182x10 <sup>-7</sup>           | 1.077x10 <sup>-9</sup>           | 8.762x10 <sup>-2</sup> | 1.636                  |
| 230 | 2.284 | 4.960x10 <sup>-2</sup> | 7.109x10 <sup>-2</sup> | 2.039x10 <sup>-2</sup>         | 9.177x10 <sup>-4</sup> | 1.116x10 <sup>-6</sup>           | 1.423x10 <sup>-9</sup>           | 9.148x10 <sup>-2</sup> | 1.844                  |
| 235 | 2.291 | 4.571x10 <sup>-2</sup> | 7.322x10 <sup>-2</sup> | 2.207x10 <sup>-2</sup>         | 9.916x10 <sup>-4</sup> | 1.344x10 <sup>-6</sup>           | 1.861x10 <sup>-9</sup>           | 9.529x10 <sup>-2</sup> | 2.085                  |
| 240 | 2.300 | 4.192x10 <sup>-2</sup> | 7.517x10 <sup>-2</sup> | 2.384x10 <sup>-2</sup>         | 1.064x10 <sup>-3</sup> | 1.606x10 <sup>-6</sup>           | 2.409x10 <sup>-9</sup>           | 9.901x10 <sup>-2</sup> | 2.362                  |
| 245 | 2.309 | 3.824x10 <sup>-2</sup> | 7.692x10 <sup>-2</sup> | 2.571x10 <sup>-2</sup>         | 1.133x10 <sup>-3</sup> | 1.902x10 <sup>-6</sup>           | 3.090x10 <sup>-9</sup>           | 1.026x10 <sup>-1</sup> | 2.684                  |
| 250 | 2.319 | 3.470x10 <sup>-2</sup> | 7.842x10 <sup>-2</sup> | 2.768x10 <sup>-2</sup>         | 1.199x10 <sup>-3</sup> | 2.237x10 <sup>-6</sup>           | 3.932x10 <sup>-9</sup>           | 1.061x10 <sup>-1</sup> | 3.058                  |
| 255 | 2.331 | 3.133x10 <sup>-2</sup> | 7.968x10 <sup>-2</sup> | 2.973x10 <sup>-2</sup>         | 1.259x10 <sup>-3</sup> | 2.612x10 <sup>-6</sup>           | 4.969x10 <sup>-9</sup>           | 1.094x10 <sup>-1</sup> | 3.492                  |
| 260 | 2.344 | 2.814x10 <sup>-2</sup> | 8.066x10 <sup>-2</sup> | 3.188x10 <sup>-2</sup>         | 1.314x10 <sup>-3</sup> | 3.029x10 <sup>-6</sup>           | 6.239x10 <sup>-9</sup>           | 1.125x10 <sup>-1</sup> | 3.999                  |
| 265 | 2.358 | 2.516x10 <sup>-2</sup> | 8.135x10 <sup>-2</sup> | 3.412x10 <sup>-2</sup>         | 1.364x10 <sup>-3</sup> | 3.492x10 <sup>-6</sup>           | 7.795x10 <sup>-9</sup>           | 1.155x10 <sup>-1</sup> | 4.590                  |
| 270 | 2.374 | 2.239x10 <sup>-2</sup> | 8.176x10 <sup>-2</sup> | 3.644x10 <sup>-2</sup>         | 1.406x10 <sup>-3</sup> | 4.004x10 <sup>-6</sup>           | 9.697x10 <sup>-9</sup>           | 1.182x10 <sup>-1</sup> | 5.279                  |
| 275 | 2.393 | 1.984x10 <sup>-2</sup> | 8.188x10 <sup>-2</sup> | 3.884x10 <sup>-2</sup>         | 1.442x10 <sup>-3</sup> | 4.569x10 <sup>-6</sup>           | 1.203x10 <sup>-8</sup>           | 1.207x10 <sup>-1</sup> | 6.085                  |
| 280 | 2.413 | 1.751x10 <sup>-2</sup> | 8.171x10 <sup>-2</sup> | 4.130x10 <sup>-2</sup>         | 1.470x10 <sup>-3</sup> | 5.190x10 <sup>-6</sup>           | 1.489x10 <sup>-8</sup>           | 1.230x10 <sup>-1</sup> | 7.023                  |
| 285 | 2.436 | 1.542x10 <sup>-2</sup> | 8.128x10 <sup>-2</sup> | 4.381x10 <sup>-2</sup>         | 1.492x10 <sup>-3</sup> | 5.873x10 <sup>-6</sup>           | 1.841x10 <sup>-8</sup>           | 1.251x10 <sup>-1</sup> | 8.113                  |
| 290 | 2.461 | 1.354x10 <sup>-2</sup> | 8.059x10 <sup>-2</sup> | 4.636x10 <sup>-2</sup>         | 1.508x10 <sup>-3</sup> | 6.624x10 <sup>-6</sup>           | 2.276x10 <sup>-8</sup>           | 1.269x10 <sup>-1</sup> | 9.377                  |
| 295 | 2.489 | 1.187x10 <sup>-2</sup> | 7.969x10 <sup>-2</sup> | 4.892x10 <sup>-2</sup>         | 1.518x10 <sup>-3</sup> | 7.450x10 <sup>-6</sup>           | 2.816x10 <sup>-8</sup>           | 1.286x10 <sup>-1</sup> | 10.83                  |
| 300 | 2.521 | 1.041x10 <sup>-2</sup> | 7.859x10 <sup>-2</sup> | 5.147x10 <sup>-2</sup>         | 1.522x10 <sup>-3</sup> | 8.359x10 <sup>-6</sup>           | 3.492x10 <sup>-8</sup>           | 1.301x10 <sup>-1</sup> | 12.50                  |

**Table S8:** Aqueous speciation calculations using GEM-Selektor and the composition of the 0.27 mol/kg DyCl<sub>3</sub> experimental solution (Table 1). Listed are the calculated pH values at temperature T, the concentrations of aqueous Dy species and the combined concentration of Dy chloride complexes (Dy-Cl) used to plot Figure 8B, and the ratio of Dy chloride species to the Dy<sup>3+</sup> aqua ion (Dy-Cl/Dy<sup>3+</sup>) used in Figure 10.

| T   | pH    | Dy <sup>3+</sup>       | DyCl <sup>2+</sup>     | DyCl <sub>2</sub> <sup>+</sup> | DyOH <sup>2+</sup>     | Dy(OH) <sub>2</sub> <sup>+</sup> | Dy(OH) <sub>3</sub> <sup>0</sup> | Dy-Cl complexes        | Dy-Cl/Dy <sup>3+</sup> |
|-----|-------|------------------------|------------------------|--------------------------------|------------------------|----------------------------------|----------------------------------|------------------------|------------------------|
| °C  |       | mol/kg                 | mol/kg                 | mol/kg                         | mol/kg                 | mol/kg                           | mol/kg                           | mol/kg                 |                        |
| 25  | 2.172 | 2.337x10 <sup>-1</sup> | 3.540x10 <sup>-2</sup> | 1.869x10 <sup>-3</sup>         | 2.775x10 <sup>-8</sup> | 3.783x10 <sup>-15</sup>          | 7.506x10 <sup>-22</sup>          | 3.727x10 <sup>-2</sup> | 0.1594                 |
| 30  | 2.167 | 2.345x10 <sup>-1</sup> | 3.452x10 <sup>-2</sup> | 1.988x10 <sup>-3</sup>         | 4.564x10 <sup>-8</sup> | 9.450x10 <sup>-15</sup>          | 2.999x10 <sup>-21</sup>          | 3.651x10 <sup>-2</sup> | 0.1557                 |
| 35  | 2.164 | 2.349x10 <sup>-1</sup> | 3.396x10 <sup>-2</sup> | 2.123x10 <sup>-3</sup>         | 7.372x10 <sup>-8</sup> | 2.278x10 <sup>-14</sup>          | 1.130x10 <sup>-20</sup>          | 3.608x10 <sup>-2</sup> | 0.1536                 |
| 40  | 2.162 | 2.351x10 <sup>-1</sup> | 3.365x10 <sup>-2</sup> | 2.275x10 <sup>-3</sup>         | 1.170x10 <sup>-7</sup> | 5.308x10 <sup>-14</sup>          | 4.025x10 <sup>-2</sup>           | 3.592x10 <sup>-2</sup> | 0.1528                 |
| 45  | 2.161 | 2.350x10 <sup>-1</sup> | 3.356x10 <sup>-2</sup> | 2.445x10 <sup>-3</sup>         | 1.826x10 <sup>-7</sup> | 1.196x10 <sup>-13</sup>          | 1.360x10 <sup>-19</sup>          | 3.601x10 <sup>-2</sup> | 0.1532                 |
| 50  | 2.160 | 2.347x10 <sup>-1</sup> | 3.368x10 <sup>-2</sup> | 2.634x10 <sup>-3</sup>         | 2.806x10 <sup>-7</sup> | 2.617x10 <sup>-13</sup>          | 4.374x10 <sup>-19</sup>          | 3.632x10 <sup>-2</sup> | 0.1547                 |
| 55  | 2.160 | 2.342x10 <sup>-1</sup> | 3.399x10 <sup>-2</sup> | 2.845x10 <sup>-3</sup>         | 4.244x10 <sup>-7</sup> | 5.552x10 <sup>-13</sup>          | 1.341x10 <sup>-18</sup>          | 3.683x10 <sup>-2</sup> | 0.1573                 |
| 60  | 2.161 | 2.335x10 <sup>-1</sup> | 3.446x10 <sup>-2</sup> | 3.077x10 <sup>-3</sup>         | 6.325x10 <sup>-7</sup> | 1.147x10 <sup>-12</sup>          | 3.931x10 <sup>-18</sup>          | 3.754x10 <sup>-2</sup> | 0.1608                 |
| 65  | 2.162 | 2.326x10 <sup>-1</sup> | 3.510x10 <sup>-2</sup> | 3.336x10 <sup>-3</sup>         | 9.299x10 <sup>-7</sup> | 2.306x10 <sup>-12</sup>          | 1.104x10 <sup>-17</sup>          | 3.844x10 <sup>-2</sup> | 0.1653                 |
| 70  | 2.163 | 2.315x10 <sup>-1</sup> | 3.590x10 <sup>-2</sup> | 3.619x10 <sup>-3</sup>         | 1.348x10 <sup>-6</sup> | 4.518x10 <sup>-12</sup>          | 2.977x10 <sup>-17</sup>          | 3.952x10 <sup>-2</sup> | 0.1707                 |
| 75  | 2.166 | 2.302x10 <sup>-1</sup> | 3.685x10 <sup>-2</sup> | 3.932x10 <sup>-3</sup>         | 1.929x10 <sup>-6</sup> | 8.638x10 <sup>-12</sup>          | 7.721x10 <sup>-17</sup>          | 4.078x10 <sup>-2</sup> | 0.1771                 |
| 80  | 2.168 | 2.288x10 <sup>-1</sup> | 3.794x10 <sup>-2</sup> | 4.276x10 <sup>-3</sup>         | 2.727x10 <sup>-6</sup> | 1.614x10 <sup>-11</sup>          | 1.930x10 <sup>-16</sup>          | 4.222x10 <sup>-2</sup> | 0.1845                 |
| 85  | 2.171 | 2.272x10 <sup>-1</sup> | 3.918x10 <sup>-2</sup> | 4.653x10 <sup>-3</sup>         | 3.808x10 <sup>-6</sup> | 2.948x10 <sup>-11</sup>          | 4.658x10 <sup>-16</sup>          | 4.384x10 <sup>-2</sup> | 0.1930                 |
| 90  | 2.175 | 2.254x10 <sup>-1</sup> | 4.057x10 <sup>-2</sup> | 5.067x10 <sup>-3</sup>         | 5.257x10 <sup>-6</sup> | 5.271x10 <sup>-11</sup>          | 1.087x10 <sup>-15</sup>          | 4.564x10 <sup>-2</sup> | 0.2025                 |
| 95  | 2.178 | 2.234x10 <sup>-1</sup> | 4.211x10 <sup>-2</sup> | 5.519x10 <sup>-3</sup>         | 7.177x10 <sup>-6</sup> | 9.236x10 <sup>-11</sup>          | 2.457x10 <sup>-15</sup>          | 4.763x10 <sup>-2</sup> | 0.2132                 |
| 100 | 2.182 | 2.212x10 <sup>-1</sup> | 4.380x10 <sup>-2</sup> | 6.015x10 <sup>-3</sup>         | 9.695x10 <sup>-6</sup> | 1.587x10 <sup>-10</sup>          | 5.384x10 <sup>-15</sup>          | 4.981x10 <sup>-2</sup> | 0.2252                 |
| 105 | 2.187 | 2.188x10 <sup>-1</sup> | 4.563x10 <sup>-2</sup> | 6.556x10 <sup>-3</sup>         | 1.296x10 <sup>-5</sup> | 2.676x10 <sup>-10</sup>          | 1.146x10 <sup>-14</sup>          | 5.219x10 <sup>-2</sup> | 0.2385                 |
| 110 | 2.192 | 2.162x10 <sup>-1</sup> | 4.762x10 <sup>-2</sup> | 7.147x10 <sup>-3</sup>         | 1.715x10 <sup>-5</sup> | 4.432x10 <sup>-10</sup>          | 2.372x10 <sup>-14</sup>          | 5.477x10 <sup>-2</sup> | 0.2533                 |
| 115 | 2.197 | 2.134x10 <sup>-1</sup> | 4.976x10 <sup>-2</sup> | 7.789x10 <sup>-3</sup>         | 2.246x10 <sup>-5</sup> | 7.214x10 <sup>-10</sup>          | 4.778x10 <sup>-14</sup>          | 5.755x10 <sup>-2</sup> | 0.2696                 |
| 120 | 2.202 | 2.104x10 <sup>-1</sup> | 5.206x10 <sup>-2</sup> | 8.488x10 <sup>-3</sup>         | 2.919x10 <sup>-5</sup> | 1.155x10 <sup>-9</sup>           | 9.380x10 <sup>-14</sup>          | 6.054x10 <sup>-2</sup> | 0.2877                 |
| 125 | 2.207 | 2.072x10 <sup>-1</sup> | 5.451x10 <sup>-2</sup> | 9.248x10 <sup>-3</sup>         | 3.756x10 <sup>-5</sup> | 1.818x10 <sup>-9</sup>           | 1.797x10 <sup>-13</sup>          | 6.376x10 <sup>-2</sup> | 0.3077                 |
| 130 | 2.213 | 2.038x10 <sup>-1</sup> | 5.712x10 <sup>-2</sup> | 1.007x10 <sup>-2</sup>         | 4.789x10 <sup>-5</sup> | 2.820x10 <sup>-9</sup>           | 3.358x10 <sup>-13</sup>          | 6.719x10 <sup>-2</sup> | 0.3298                 |
| 135 | 2.219 | 2.001x10 <sup>-1</sup> | 5.989x10 <sup>-2</sup> | 1.096x10 <sup>-2</sup>         | 6.055x10 <sup>-5</sup> | 4.307x10 <sup>-9</sup>           | 6.141x10 <sup>-13</sup>          | 7.085x10 <sup>-2</sup> | 0.3541                 |
| 140 | 2.225 | 1.962x10 <sup>-1</sup> | 6.280x10 <sup>-2</sup> | 1.193x10 <sup>-2</sup>         | 7.587x10 <sup>-5</sup> | 6.481x10 <sup>-9</sup>           | 1.097x10 <sup>-12</sup>          | 7.473x10 <sup>-2</sup> | 0.3809                 |
| 145 | 2.232 | 1.921x10 <sup>-1</sup> | 6.589x10 <sup>-2</sup> | 1.297x10 <sup>-2</sup>         | 9.433x10 <sup>-5</sup> | 9.621x10 <sup>-9</sup>           | 1.919x10 <sup>-12</sup>          | 7.885x10 <sup>-2</sup> | 0.4106                 |
| 150 | 2.238 | 1.877x10 <sup>-1</sup> | 6.911x10 <sup>-2</sup> | 1.409x10 <sup>-2</sup>         | 1.163x10 <sup>-4</sup> | 1.408x10 <sup>-8</sup>           | 3.287x10 <sup>-12</sup>          | 8.320x10 <sup>-2</sup> | 0.4433                 |
| 155 | 2.245 | 1.831x10 <sup>-1</sup> | 7.248x10 <sup>-2</sup> | 1.529x10 <sup>-2</sup>         | 1.422x10 <sup>-4</sup> | 2.034x10 <sup>-8</sup>           | 5.519x10 <sup>-12</sup>          | 8.777x10 <sup>-2</sup> | 0.4794                 |
| 160 | 2.251 | 1.783x10 <sup>-1</sup> | 7.599x10 <sup>-2</sup> | 1.659x10 <sup>-2</sup>         | 1.726x10 <sup>-4</sup> | 2.898x10 <sup>-8</sup>           | 9.090x10 <sup>-12</sup>          | 9.258x10 <sup>-2</sup> | 0.5193                 |
| 165 | 2.258 | 1.732x10 <sup>-1</sup> | 7.962x10 <sup>-2</sup> | 1.797x10 <sup>-2</sup>         | 2.077x10 <sup>-4</sup> | 4.078x10 <sup>-8</sup>           | 1.468x10 <sup>-11</sup>          | 9.759x10 <sup>-2</sup> | 0.5635                 |
| 170 | 2.265 | 1.679x10 <sup>-1</sup> | 8.338x10 <sup>-2</sup> | 1.946x10 <sup>-2</sup>         | 2.482x10 <sup>-4</sup> | 5.667x10 <sup>-8</sup>           | 2.329x10 <sup>-11</sup>          | 1.028x10 <sup>-1</sup> | 0.6124                 |
| 175 | 2.272 | 1.624x10 <sup>-1</sup> | 8.723x10 <sup>-2</sup> | 2.104x10 <sup>-2</sup>         | 2.942x10 <sup>-4</sup> | 7.777x10 <sup>-8</sup>           | 3.629x10 <sup>-11</sup>          | 1.083x10 <sup>-1</sup> | 0.6665                 |
| 180 | 2.280 | 1.568x10 <sup>-1</sup> | 9.118x10 <sup>-2</sup> | 2.272x10 <sup>-2</sup>         | 3.460x10 <sup>-4</sup> | 1.055x10 <sup>-7</sup>           | 5.556x10 <sup>-11</sup>          | 1.139x10 <sup>-1</sup> | 0.7265                 |
| 185 | 2.287 | 1.509x10 <sup>-1</sup> | 9.519x10 <sup>-2</sup> | 2.450x10 <sup>-2</sup>         | 4.039x10 <sup>-4</sup> | 1.413x10 <sup>-7</sup>           | 8.362x10 <sup>-11</sup>          | 1.197x10 <sup>-1</sup> | 0.7931                 |
| 190 | 2.294 | 1.449x10 <sup>-1</sup> | 9.926x10 <sup>-2</sup> | 2.639x10 <sup>-2</sup>         | 4.680x10 <sup>-4</sup> | 1.872x10 <sup>-7</sup>           | 1.238x10 <sup>-10</sup>          | 1.256x10 <sup>-1</sup> | 0.8672                 |
| 195 | 2.302 | 1.387x10 <sup>-1</sup> | 1.033x10 <sup>-1</sup> | 2.839x10 <sup>-2</sup>         | 5.383x10 <sup>-4</sup> | 2.452x10 <sup>-7</sup>           | 1.805x10 <sup>-10</sup>          | 1.317x10 <sup>-1</sup> | 0.9496                 |



**Table S8:** continued

| T   | pH    | Dy <sup>3+</sup>       | DyCl <sup>2+</sup>     | DyCl <sub>2</sub> <sup>+</sup> | DyOH <sup>2+</sup>     | Dy(OH) <sub>2</sub> <sup>+</sup> | Dy(OH) <sub>3</sub> <sup>0</sup> | Dy-Cl complexes        | Dy-Cl/Dy <sup>3+</sup> |
|-----|-------|------------------------|------------------------|--------------------------------|------------------------|----------------------------------|----------------------------------|------------------------|------------------------|
| °C  |       | mol/kg                 | mol/kg                 | mol/kg                         | mol/kg                 | mol/kg                           | mol/kg                           | mol/kg                 |                        |
| 200 | 2.310 | 1.324x10 <sup>-1</sup> | 1.074x10 <sup>-1</sup> | 3.050x10 <sup>-2</sup>         | 6.146x10 <sup>-4</sup> | 3.176x10 <sup>-7</sup>           | 2.592x10 <sup>-10</sup>          | 1.379x10 <sup>-1</sup> | 1.041                  |
| 205 | 2.317 | 1.261x10 <sup>-1</sup> | 1.115x10 <sup>-1</sup> | 3.272x10 <sup>-2</sup>         | 6.965x10 <sup>-4</sup> | 4.071x10 <sup>-7</sup>           | 3.667x10 <sup>-10</sup>          | 1.442x10 <sup>-1</sup> | 1.144                  |
| 210 | 2.326 | 1.196x10 <sup>-1</sup> | 1.155x10 <sup>-1</sup> | 3.506x10 <sup>-2</sup>         | 7.839x10 <sup>-4</sup> | 5.165x10 <sup>-7</sup>           | 5.118x10 <sup>-10</sup>          | 1.506x10 <sup>-1</sup> | 1.259                  |
| 215 | 2.334 | 1.131x10 <sup>-1</sup> | 1.195x10 <sup>-1</sup> | 3.751x10 <sup>-2</sup>         | 8.760x10 <sup>-4</sup> | 6.489x10 <sup>-7</sup>           | 7.049x10 <sup>-10</sup>          | 1.570x10 <sup>-1</sup> | 1.387                  |
| 220 | 2.343 | 1.067x10 <sup>-1</sup> | 1.233x10 <sup>-1</sup> | 4.009x10 <sup>-2</sup>         | 9.721x10 <sup>-4</sup> | 8.075x10 <sup>-7</sup>           | 9.588x10 <sup>-10</sup>          | 1.634x10 <sup>-1</sup> | 1.532                  |
| 225 | 2.353 | 1.002x10 <sup>-1</sup> | 1.270x10 <sup>-1</sup> | 4.278x10 <sup>-2</sup>         | 1.072x10 <sup>-3</sup> | 9.957x10 <sup>-7</sup>           | 1.289x10 <sup>-9</sup>           | 1.697x10 <sup>-1</sup> | 1.694                  |
| 230 | 2.363 | 9.378x10 <sup>-2</sup> | 1.304x10 <sup>-1</sup> | 4.559x10 <sup>-2</sup>         | 1.174x10 <sup>-3</sup> | 1.217x10 <sup>-6</sup>           | 1.715x10 <sup>-9</sup>           | 1.760x10 <sup>-1</sup> | 1.877                  |
| 235 | 2.373 | 8.747x10 <sup>-2</sup> | 1.337x10 <sup>-1</sup> | 4.853x10 <sup>-2</sup>         | 1.277x10 <sup>-3</sup> | 1.476x10 <sup>-6</sup>           | 2.259x10 <sup>-9</sup>           | 1.822x10 <sup>-1</sup> | 2.083                  |
| 240 | 2.385 | 8.129x10 <sup>-2</sup> | 1.367x10 <sup>-1</sup> | 5.159x10 <sup>-2</sup>         | 1.381x10 <sup>-3</sup> | 1.776x10 <sup>-6</sup>           | 2.950x10 <sup>-9</sup>           | 1.883x10 <sup>-1</sup> | 2.317                  |
| 245 | 2.398 | 7.526x10 <sup>-2</sup> | 1.395x10 <sup>-1</sup> | 5.477x10 <sup>-2</sup>         | 1.484x10 <sup>-3</sup> | 2.123x10 <sup>-6</sup>           | 3.820x10 <sup>-9</sup>           | 1.943x10 <sup>-1</sup> | 2.581                  |
| 250 | 2.411 | 6.943x10 <sup>-2</sup> | 1.419x10 <sup>-1</sup> | 5.807x10 <sup>-2</sup>         | 1.586x10 <sup>-3</sup> | 2.519x10 <sup>-6</sup>           | 4.912x10 <sup>-9</sup>           | 2.000x10 <sup>-1</sup> | 2.880                  |
| 255 | 2.426 | 6.383x10 <sup>-2</sup> | 1.440x10 <sup>-1</sup> | 6.148x10 <sup>-2</sup>         | 1.685x10 <sup>-3</sup> | 2.972x10 <sup>-6</sup>           | 6.278x10 <sup>-9</sup>           | 2.055x10 <sup>-1</sup> | 3.219                  |
| 260 | 2.443 | 5.849x10 <sup>-2</sup> | 1.457x10 <sup>-1</sup> | 6.499x10 <sup>-2</sup>         | 1.781x10 <sup>-3</sup> | 3.486x10 <sup>-6</sup>           | 7.981x10 <sup>-9</sup>           | 2.107x10 <sup>-1</sup> | 3.603                  |
| 265 | 2.461 | 5.342x10 <sup>-2</sup> | 1.471x10 <sup>-1</sup> | 6.861x10 <sup>-2</sup>         | 1.873x10 <sup>-3</sup> | 4.068x10 <sup>-6</sup>           | 1.010x10 <sup>-8</sup>           | 2.157x10 <sup>-1</sup> | 4.038                  |
| 270 | 2.480 | 4.867x10 <sup>-2</sup> | 1.481x10 <sup>-1</sup> | 7.230x10 <sup>-2</sup>         | 1.960x10 <sup>-3</sup> | 4.725x10 <sup>-6</sup>           | 1.275x10 <sup>-8</sup>           | 2.204x10 <sup>-1</sup> | 4.528                  |
| 275 | 2.502 | 4.423x10 <sup>-2</sup> | 1.487x10 <sup>-1</sup> | 7.606x10 <sup>-2</sup>         | 2.042x10 <sup>-3</sup> | 5.466x10 <sup>-6</sup>           | 1.605x10 <sup>-8</sup>           | 2.247x10 <sup>-1</sup> | 5.080                  |
| 280 | 2.526 | 4.014x10 <sup>-2</sup> | 1.489x10 <sup>-1</sup> | 7.984x10 <sup>-2</sup>         | 2.119x10 <sup>-3</sup> | 6.298x10 <sup>-6</sup>           | 2.016x10 <sup>-8</sup>           | 2.287x10 <sup>-1</sup> | 5.698                  |
| 285 | 2.553 | 3.640x10 <sup>-2</sup> | 1.488x10 <sup>-1</sup> | 8.363x10 <sup>-2</sup>         | 2.190x10 <sup>-3</sup> | 7.232x10 <sup>-6</sup>           | 2.532x10 <sup>-8</sup>           | 2.324x10 <sup>-1</sup> | 6.384                  |
| 290 | 2.582 | 3.302x10 <sup>-2</sup> | 1.483x10 <sup>-1</sup> | 8.739x10 <sup>-2</sup>         | 2.256x10 <sup>-3</sup> | 8.280x10 <sup>-6</sup>           | 3.178x10 <sup>-8</sup>           | 2.357x10 <sup>-1</sup> | 7.139                  |
| 295 | 2.614 | 3.000x10 <sup>-2</sup> | 1.476x10 <sup>-1</sup> | 9.104x10 <sup>-2</sup>         | 2.317x10 <sup>-3</sup> | 9.450x10 <sup>-6</sup>           | 3.991x10 <sup>-8</sup>           | 2.387x10 <sup>-1</sup> | 7.957                  |
| 300 | 2.649 | 2.734x10 <sup>-2</sup> | 1.467x10 <sup>-1</sup> | 9.454x10 <sup>-2</sup>         | 2.374x10 <sup>-3</sup> | 1.076x10 <sup>-5</sup>           | 5.014x10 <sup>-8</sup>           | 2.413x10 <sup>-1</sup> | 8.825                  |

**Table S9:** Aqueous speciation calculations using GEM-Selektor and the composition of the 0.59 mol/kg DyCl<sub>3</sub> experimental solution (Table 1). Listed are the calculated pH values at temperature T, the concentrations of aqueous Dy species and the combined concentration of Dy chloride complexes (Dy-Cl) used to plot Figure 8C, and the ratio of Dy chloride species to the Dy<sup>3+</sup> aqua ion (Dy-Cl/Dy<sup>3+</sup>) used in Figure 10.

| T   | pH    | Dy <sup>3+</sup>       | DyCl <sup>2+</sup>     | DyCl <sub>2</sub> <sup>+</sup> | DyOH <sup>2+</sup>     | Dy(OH) <sub>2</sub> <sup>+</sup> | Dy(OH) <sub>3</sub> <sup>0</sup> | Dy-Cl complexes        | Dy-Cl/Dy <sup>3+</sup> |
|-----|-------|------------------------|------------------------|--------------------------------|------------------------|----------------------------------|----------------------------------|------------------------|------------------------|
| °C  |       | mol/kg                 | mol/kg                 | mol/kg                         | mol/kg                 | mol/kg                           | mol/kg                           | mol/kg                 |                        |
| 25  | 2.172 | 4.649x10 <sup>-1</sup> | 1.162x10 <sup>-1</sup> | 1.190x10 <sup>-2</sup>         | 3.608x10 <sup>-8</sup> | 3.864x10 <sup>-15</sup>          | 8.819x10 <sup>-22</sup>          | 1.281x10 <sup>-1</sup> | 0.2756                 |
| 30  | 2.162 | 4.660x10 <sup>-1</sup> | 1.141x10 <sup>-1</sup> | 1.285x10 <sup>-2</sup>         | 5.842x10 <sup>-8</sup> | 9.371x10 <sup>-15</sup>          | 3.402x10 <sup>-21</sup>          | 1.270x10 <sup>-1</sup> | 0.2725                 |
| 35  | 2.154 | 4.664x10 <sup>-1</sup> | 1.127x10 <sup>-1</sup> | 1.386x10 <sup>-2</sup>         | 9.302x10 <sup>-8</sup> | 2.199x10 <sup>-14</sup>          | 1.243x10 <sup>-20</sup>          | 1.266x10 <sup>-1</sup> | 0.2714                 |
| 40  | 2.147 | 4.661x10 <sup>-1</sup> | 1.119x10 <sup>-1</sup> | 1.495x10 <sup>-2</sup>         | 1.457x10 <sup>-7</sup> | 4.998x10 <sup>-14</sup>          | 4.309x10 <sup>-20</sup>          | 1.269x10 <sup>-1</sup> | 0.2722                 |
| 45  | 2.142 | 4.652x10 <sup>-1</sup> | 1.117x10 <sup>-1</sup> | 1.611x10 <sup>-2</sup>         | 2.248x10 <sup>-7</sup> | 1.105x10 <sup>-13</sup>          | 1.423x10 <sup>-19</sup>          | 1.278x10 <sup>-1</sup> | 0.2747                 |
| 50  | 2.139 | 4.637x10 <sup>-1</sup> | 1.119x10 <sup>-1</sup> | 1.736x10 <sup>-2</sup>         | 3.418x10 <sup>-7</sup> | 2.373x10 <sup>-13</sup>          | 4.480x10 <sup>-19</sup>          | 1.293x10 <sup>-1</sup> | 0.2788                 |
| 55  | 2.137 | 4.617x10 <sup>-1</sup> | 1.126x10 <sup>-1</sup> | 1.869x10 <sup>-2</sup>         | 5.125x10 <sup>-7</sup> | 4.965x10 <sup>-13</sup>          | 1.350x10 <sup>-18</sup>          | 1.313x10 <sup>-1</sup> | 0.2843                 |
| 60  | 2.136 | 4.592x10 <sup>-1</sup> | 1.137x10 <sup>-1</sup> | 2.010x10 <sup>-2</sup>         | 7.578x10 <sup>-7</sup> | 1.012x10 <sup>-12</sup>          | 3.898x10 <sup>-18</sup>          | 1.338x10 <sup>-1</sup> | 0.2913                 |
| 65  | 2.136 | 4.563x10 <sup>-1</sup> | 1.151x10 <sup>-1</sup> | 2.160x10 <sup>-2</sup>         | 1.105x10 <sup>-6</sup> | 2.012x10 <sup>-12</sup>          | 1.081x10 <sup>-17</sup>          | 1.367x10 <sup>-1</sup> | 0.2996                 |
| 70  | 2.138 | 4.529x10 <sup>-1</sup> | 1.169x10 <sup>-1</sup> | 2.321x10 <sup>-2</sup>         | 1.594x10 <sup>-6</sup> | 3.909x10 <sup>-12</sup>          | 2.884x10 <sup>-17</sup>          | 1.401x10 <sup>-1</sup> | 0.3093                 |
| 75  | 2.140 | 4.491x10 <sup>-1</sup> | 1.190x10 <sup>-1</sup> | 2.490x10 <sup>-2</sup>         | 2.270x10 <sup>-6</sup> | 7.425x10 <sup>-12</sup>          | 7.423x10 <sup>-17</sup>          | 1.439x10 <sup>-1</sup> | 0.3204                 |
| 80  | 2.143 | 4.449x10 <sup>-1</sup> | 1.214x10 <sup>-1</sup> | 2.670x10 <sup>-2</sup>         | 3.193x10 <sup>-6</sup> | 1.380x10 <sup>-11</sup>          | 1.845x10 <sup>-16</sup>          | 1.481x10 <sup>-1</sup> | 0.3330                 |
| 85  | 2.146 | 4.403x10 <sup>-1</sup> | 1.241x10 <sup>-1</sup> | 2.860x10 <sup>-2</sup>         | 4.442x10 <sup>-6</sup> | 2.512x10 <sup>-11</sup>          | 4.434x10 <sup>-16</sup>          | 1.527x10 <sup>-1</sup> | 0.3469                 |
| 90  | 2.151 | 4.352x10 <sup>-1</sup> | 1.271x10 <sup>-1</sup> | 3.061x10 <sup>-2</sup>         | 6.112x10 <sup>-6</sup> | 4.483x10 <sup>-11</sup>          | 1.032x10 <sup>-15</sup>          | 1.577x10 <sup>-1</sup> | 0.3624                 |
| 95  | 2.156 | 4.299x10 <sup>-1</sup> | 1.304x10 <sup>-1</sup> | 3.272x10 <sup>-2</sup>         | 8.319x10 <sup>-6</sup> | 7.848x10 <sup>-11</sup>          | 2.330x10 <sup>-15</sup>          | 1.631x10 <sup>-1</sup> | 0.3795                 |
| 100 | 2.162 | 4.241x10 <sup>-1</sup> | 1.339x10 <sup>-1</sup> | 3.494x10 <sup>-2</sup>         | 1.121x10 <sup>-5</sup> | 1.348x10 <sup>-10</sup>          | 5.108x10 <sup>-15</sup>          | 1.689x10 <sup>-1</sup> | 0.3982                 |
| 105 | 2.169 | 4.180x10 <sup>-1</sup> | 1.377x10 <sup>-1</sup> | 3.728x10 <sup>-2</sup>         | 1.498x10 <sup>-5</sup> | 2.279x10 <sup>-10</sup>          | 1.090x10 <sup>-14</sup>          | 1.750x10 <sup>-1</sup> | 0.4187                 |
| 110 | 2.176 | 4.115x10 <sup>-1</sup> | 1.418x10 <sup>-1</sup> | 3.973x10 <sup>-2</sup>         | 1.979x10 <sup>-5</sup> | 3.783x10 <sup>-10</sup>          | 2.259x10 <sup>-14</sup>          | 1.815x10 <sup>-1</sup> | 0.4411                 |
| 115 | 2.183 | 4.046x10 <sup>-1</sup> | 1.460x10 <sup>-1</sup> | 4.229x10 <sup>-2</sup>         | 2.592x10 <sup>-5</sup> | 6.177x10 <sup>-10</sup>          | 4.571x10 <sup>-14</sup>          | 1.883x10 <sup>-1</sup> | 0.4654                 |
| 120 | 2.192 | 3.975x10 <sup>-1</sup> | 1.505x10 <sup>-1</sup> | 4.497x10 <sup>-2</sup>         | 3.365x10 <sup>-5</sup> | 9.932x10 <sup>-10</sup>          | 9.020x10 <sup>-14</sup>          | 1.955x10 <sup>-1</sup> | 0.4919                 |
| 125 | 2.200 | 3.899x10 <sup>-1</sup> | 1.552x10 <sup>-1</sup> | 4.777x10 <sup>-2</sup>         | 4.332x10 <sup>-5</sup> | 1.572x10 <sup>-9</sup>           | 1.737x10 <sup>-13</sup>          | 2.030x10 <sup>-1</sup> | 0.5206                 |
| 130 | 2.209 | 3.821x10 <sup>-1</sup> | 1.602x10 <sup>-1</sup> | 5.068x10 <sup>-2</sup>         | 5.521x10 <sup>-5</sup> | 2.452x10 <sup>-9</sup>           | 3.270x10 <sup>-13</sup>          | 2.108x10 <sup>-1</sup> | 0.5518                 |
| 135 | 2.219 | 3.739x10 <sup>-1</sup> | 1.653x10 <sup>-1</sup> | 5.372x10 <sup>-2</sup>         | 6.986x10 <sup>-5</sup> | 3.769x10 <sup>-9</sup>           | 6.022x10 <sup>-13</sup>          | 2.190x10 <sup>-1</sup> | 0.5857                 |
| 140 | 2.228 | 3.655x10 <sup>-1</sup> | 1.706x10 <sup>-1</sup> | 5.687x10 <sup>-2</sup>         | 8.773x10 <sup>-5</sup> | 5.711x10 <sup>-9</sup>           | 1.085x10 <sup>-12</sup>          | 2.274x10 <sup>-1</sup> | 0.6224                 |
| 145 | 2.239 | 3.567x10 <sup>-1</sup> | 1.760x10 <sup>-1</sup> | 6.014x10 <sup>-2</sup>         | 1.092x10 <sup>-4</sup> | 8.540x10 <sup>-9</sup>           | 1.914x10 <sup>-12</sup>          | 2.362x10 <sup>-1</sup> | 0.6621                 |
| 150 | 2.249 | 3.477x10 <sup>-1</sup> | 1.817x10 <sup>-1</sup> | 6.353x10 <sup>-2</sup>         | 1.349x10 <sup>-4</sup> | 1.260x10 <sup>-8</sup>           | 3.311x10 <sup>-12</sup>          | 2.452x10 <sup>-1</sup> | 0.7053                 |
| 155 | 2.260 | 3.384x10 <sup>-1</sup> | 1.874x10 <sup>-1</sup> | 6.704x10 <sup>-2</sup>         | 1.654x10 <sup>-4</sup> | 1.835x10 <sup>-8</sup>           | 5.614x10 <sup>-12</sup>          | 2.545x10 <sup>-1</sup> | 0.7521                 |
| 160 | 2.271 | 3.288x10 <sup>-1</sup> | 1.933x10 <sup>-1</sup> | 7.066x10 <sup>-2</sup>         | 2.012x10 <sup>-4</sup> | 2.639x10 <sup>-8</sup>           | 9.340x10 <sup>-12</sup>          | 2.640x10 <sup>-1</sup> | 0.8029                 |
| 165 | 2.282 | 3.190x10 <sup>-1</sup> | 1.993x10 <sup>-1</sup> | 7.439x10 <sup>-2</sup>         | 2.429x10 <sup>-4</sup> | 3.748x10 <sup>-8</sup>           | 1.525x10 <sup>-11</sup>          | 2.737x10 <sup>-1</sup> | 0.8579                 |
| 170 | 2.293 | 3.091x10 <sup>-1</sup> | 2.054x10 <sup>-1</sup> | 7.824x10 <sup>-2</sup>         | 2.911x10 <sup>-4</sup> | 5.257x10 <sup>-8</sup>           | 2.446x10 <sup>-11</sup>          | 2.836x10 <sup>-1</sup> | 0.9176                 |
| 175 | 2.305 | 2.990x10 <sup>-1</sup> | 2.115x10 <sup>-1</sup> | 8.219x10 <sup>-2</sup>         | 3.462x10 <sup>-4</sup> | 7.285x10 <sup>-8</sup>           | 3.853x10 <sup>-11</sup>          | 2.937x10 <sup>-1</sup> | 0.9824                 |
| 180 | 2.316 | 2.887x10 <sup>-1</sup> | 2.177x10 <sup>-1</sup> | 8.624x10 <sup>-2</sup>         | 4.089x10 <sup>-4</sup> | 9.977x10 <sup>-8</sup>           | 5.968x10 <sup>-11</sup>          | 3.039x10 <sup>-1</sup> | 1.053                  |
| 185 | 2.328 | 2.783x10 <sup>-1</sup> | 2.238x10 <sup>-1</sup> | 9.039x10 <sup>-2</sup>         | 4.795x10 <sup>-4</sup> | 1.351x10 <sup>-7</sup>           | 9.090x10 <sup>-11</sup>          | 3.142x10 <sup>-1</sup> | 1.129                  |
| 190 | 2.340 | 2.678x10 <sup>-1</sup> | 2.300x10 <sup>-1</sup> | 9.464x10 <sup>-2</sup>         | 5.583x10 <sup>-4</sup> | 1.808x10 <sup>-7</sup>           | 1.362x10 <sup>-10</sup>          | 3.246x10 <sup>-1</sup> | 1.212                  |
| 195 | 2.352 | 2.573x10 <sup>-1</sup> | 2.361x10 <sup>-1</sup> | 9.898x10 <sup>-2</sup>         | 6.455x10 <sup>-4</sup> | 2.394x10 <sup>-7</sup>           | 2.010x10 <sup>-10</sup>          | 3.350x10 <sup>-1</sup> | 1.302                  |

**Table S9:** continued

| T   | pH    | Dy <sup>3+</sup>       | DyCl <sup>2+</sup>     | DyCl <sub>2</sub> <sup>+</sup> | DyOH <sup>2+</sup>     | Dy(OH) <sub>2</sub> <sup>+</sup> | Dy(OH) <sub>3</sub> <sup>0</sup> | Dy-Cl complexes        | Dy-Cl/Dy <sup>3+</sup> |
|-----|-------|------------------------|------------------------|--------------------------------|------------------------|----------------------------------|----------------------------------|------------------------|------------------------|
| °C  |       | mol/kg                 | mol/kg                 | mol/kg                         | mol/kg                 | mol/kg                           | mol/kg                           | mol/kg                 |                        |
| 200 | 2.365 | 2.468x10 <sup>-1</sup> | 2.421x10 <sup>-1</sup> | 1.034x10 <sup>-1</sup>         | 7.413x10 <sup>-4</sup> | 3.135x10 <sup>-7</sup>           | 2.922x10 <sup>-10</sup>          | 3.455x10 <sup>-1</sup> | 1.400                  |
| 205 | 2.378 | 2.362x10 <sup>-1</sup> | 2.480x10 <sup>-1</sup> | 1.079x10 <sup>-1</sup>         | 8.458x10 <sup>-4</sup> | 4.064x10 <sup>-7</sup>           | 4.187x10 <sup>-10</sup>          | 3.559x10 <sup>-1</sup> | 1.507                  |
| 210 | 2.391 | 2.257x10 <sup>-1</sup> | 2.538x10 <sup>-1</sup> | 1.125x10 <sup>-1</sup>         | 9.586x10 <sup>-4</sup> | 5.216x10 <sup>-7</sup>           | 5.917x10 <sup>-10</sup>          | 3.663x10 <sup>-1</sup> | 1.623                  |
| 215 | 2.404 | 2.153x10 <sup>-1</sup> | 2.594x10 <sup>-1</sup> | 1.172x10 <sup>-1</sup>         | 1.080x10 <sup>-3</sup> | 6.630x10 <sup>-7</sup>           | 8.255x10 <sup>-10</sup>          | 3.766x10 <sup>-1</sup> | 1.749                  |
| 220 | 2.418 | 2.050x10 <sup>-1</sup> | 2.648x10 <sup>-1</sup> | 1.220x10 <sup>-1</sup>         | 1.209x10 <sup>-3</sup> | 8.351x10 <sup>-7</sup>           | 1.138x10 <sup>-9</sup>           | 3.868x10 <sup>-1</sup> | 1.886                  |
| 225 | 2.432 | 1.949x10 <sup>-1</sup> | 2.700x10 <sup>-1</sup> | 1.268x10 <sup>-1</sup>         | 1.345x10 <sup>-3</sup> | 1.043x10 <sup>-6</sup>           | 1.550x10 <sup>-9</sup>           | 3.968x10 <sup>-1</sup> | 2.036                  |
| 230 | 2.447 | 1.849x10 <sup>-1</sup> | 2.749x10 <sup>-1</sup> | 1.317x10 <sup>-1</sup>         | 1.488x10 <sup>-3</sup> | 1.291x10 <sup>-6</sup>           | 2.090x10 <sup>-9</sup>           | 4.066x10 <sup>-1</sup> | 2.199                  |
| 235 | 2.463 | 1.751x10 <sup>-1</sup> | 2.795x10 <sup>-1</sup> | 1.367x10 <sup>-1</sup>         | 1.638x10 <sup>-3</sup> | 1.587x10 <sup>-6</sup>           | 2.790x10 <sup>-9</sup>           | 4.162x10 <sup>-1</sup> | 2.376                  |
| 240 | 2.479 | 1.656x10 <sup>-1</sup> | 2.838x10 <sup>-1</sup> | 1.417x10 <sup>-1</sup>         | 1.793x10 <sup>-3</sup> | 1.935x10 <sup>-6</sup>           | 3.691x10 <sup>-9</sup>           | 4.256x10 <sup>-1</sup> | 2.569                  |
| 245 | 2.497 | 1.564x10 <sup>-1</sup> | 2.878x10 <sup>-1</sup> | 1.468x10 <sup>-1</sup>         | 1.953x10 <sup>-3</sup> | 2.345x10 <sup>-6</sup>           | 4.845x10 <sup>-9</sup>           | 4.346x10 <sup>-1</sup> | 2.779                  |
| 250 | 2.515 | 1.475x10 <sup>-1</sup> | 2.914x10 <sup>-1</sup> | 1.520x10 <sup>-1</sup>         | 2.118x10 <sup>-3</sup> | 2.823x10 <sup>-6</sup>           | 6.312x10 <sup>-9</sup>           | 4.434x10 <sup>-1</sup> | 3.005                  |
| 255 | 2.535 | 1.390x10 <sup>-1</sup> | 2.946x10 <sup>-1</sup> | 1.571x10 <sup>-1</sup>         | 2.286x10 <sup>-3</sup> | 3.378x10 <sup>-6</sup>           | 8.170x10 <sup>-9</sup>           | 4.517x10 <sup>-1</sup> | 3.250                  |
| 260 | 2.556 | 1.308x10 <sup>-1</sup> | 2.974x10 <sup>-1</sup> | 1.623x10 <sup>-1</sup>         | 2.456x10 <sup>-3</sup> | 4.019x10 <sup>-6</sup>           | 1.051x10 <sup>-8</sup>           | 4.597x10 <sup>-1</sup> | 3.513                  |
| 265 | 2.578 | 1.231x10 <sup>-1</sup> | 2.999x10 <sup>-1</sup> | 1.674x10 <sup>-1</sup>         | 2.629x10 <sup>-3</sup> | 4.758x10 <sup>-6</sup>           | 1.346x10 <sup>-8</sup>           | 4.672x10 <sup>-1</sup> | 3.794                  |
| 270 | 2.602 | 1.159x10 <sup>-1</sup> | 3.019x10 <sup>-1</sup> | 1.724x10 <sup>-1</sup>         | 2.804x10 <sup>-3</sup> | 5.606x10 <sup>-6</sup>           | 1.715x10 <sup>-8</sup>           | 4.743x10 <sup>-1</sup> | 4.091                  |
| 275 | 2.628 | 1.092x10 <sup>-1</sup> | 3.036x10 <sup>-1</sup> | 1.772x10 <sup>-1</sup>         | 2.980x10 <sup>-3</sup> | 6.573x10 <sup>-6</sup>           | 2.177x10 <sup>-8</sup>           | 4.808x10 <sup>-1</sup> | 4.402                  |
| 280 | 2.656 | 1.031x10 <sup>-1</sup> | 3.049x10 <sup>-1</sup> | 1.819x10 <sup>-1</sup>         | 3.158x10 <sup>-3</sup> | 7.673x10 <sup>-6</sup>           | 2.753x10 <sup>-8</sup>           | 4.867x10 <sup>-1</sup> | 4.721                  |
| 285 | 2.685 | 9.759x10 <sup>-2</sup> | 3.059x10 <sup>-1</sup> | 1.862x10 <sup>-1</sup>         | 3.336x10 <sup>-3</sup> | 8.917x10 <sup>-6</sup>           | 3.470x10 <sup>-8</sup>           | 4.921x10 <sup>-1</sup> | 5.042                  |
| 290 | 2.717 | 9.278x10 <sup>-2</sup> | 3.067x10 <sup>-1</sup> | 1.900x10 <sup>-1</sup>         | 3.515x10 <sup>-3</sup> | 1.032x10 <sup>-5</sup>           | 4.358x10 <sup>-8</sup>           | 4.967x10 <sup>-1</sup> | 5.354                  |
| 295 | 2.752 | 8.874x10 <sup>-2</sup> | 3.073x10 <sup>-1</sup> | 1.932x10 <sup>-1</sup>         | 3.696x10 <sup>-3</sup> | 1.187x10 <sup>-5</sup>           | 5.451x10 <sup>-8</sup>           | 5.006x10 <sup>-1</sup> | 5.641                  |
| 300 | 2.789 | 8.557x10 <sup>-2</sup> | 3.079x10 <sup>-1</sup> | 1.956x10 <sup>-1</sup>         | 3.878x10 <sup>-3</sup> | 1.360x10 <sup>-5</sup>           | 6.789x10 <sup>-8</sup>           | 5.035x10 <sup>-1</sup> | 5.884                  |

**Table S10:** Aqueous speciation calculations using GEM-Selektor and the composition of the 1.8 mol/kg DyCl<sub>3</sub> experimental solution (Table 1). Listed are the calculated pH values at temperature T, the concentrations of aqueous Dy species and the combined concentration of Dy chloride complexes (Dy-Cl) used to plot Figure 8D, and the ratio of Dy chloride species to the Dy<sup>3+</sup> aqua ion (Dy-Cl/Dy<sup>3+</sup>) used in Figure 10.

| T   | pH    | Dy <sup>3+</sup>       | DyCl <sup>2+</sup>     | DyCl <sub>2</sub> <sup>+</sup> | DyOH <sup>2+</sup>     | Dy(OH) <sub>2</sub> <sup>+</sup> | Dy(OH) <sub>3</sub> <sup>0</sup> | Dy-Cl complexes        | Dy-Cl/Dy <sup>3+</sup> |
|-----|-------|------------------------|------------------------|--------------------------------|------------------------|----------------------------------|----------------------------------|------------------------|------------------------|
| °C  |       | mol/kg                 | mol/kg                 | mol/kg                         | mol/kg                 | mol/kg                           | mol/kg                           | mol/kg                 |                        |
| 25  | 2.235 | 8.877x10 <sup>-1</sup> | 6.618x10 <sup>-1</sup> | 2.385x10 <sup>-1</sup>         | 4.731x10 <sup>-8</sup> | 4.579x10 <sup>-15</sup>          | 1.910x10 <sup>-21</sup>          | 9.003x10 <sup>-1</sup> | 1.014                  |
| 30  | 2.216 | 8.790x10 <sup>-1</sup> | 6.492x10 <sup>-1</sup> | 2.598x10 <sup>-1</sup>         | 7.411x10 <sup>-8</sup> | 1.052x10 <sup>-14</sup>          | 6.950x10 <sup>-21</sup>          | 9.090x10 <sup>-1</sup> | 1.034                  |
| 35  | 2.198 | 8.695x10 <sup>-1</sup> | 6.379x10 <sup>-1</sup> | 2.805x10 <sup>-1</sup>         | 1.143x10 <sup>-7</sup> | 2.343x10 <sup>-14</sup>          | 2.386x10 <sup>-20</sup>          | 9.185x10 <sup>-1</sup> | 1.056                  |
| 40  | 2.183 | 8.593x10 <sup>-1</sup> | 6.281x10 <sup>-1</sup> | 3.006x10 <sup>-1</sup>         | 1.738x10 <sup>-7</sup> | 5.070x10 <sup>-14</sup>          | 7.769x10 <sup>-20</sup>          | 9.287x10 <sup>-1</sup> | 1.081                  |
| 45  | 2.170 | 8.485x10 <sup>-1</sup> | 6.195x10 <sup>-1</sup> | 3.199x10 <sup>-1</sup>         | 2.606x10 <sup>-7</sup> | 1.069x10 <sup>-13</sup>          | 2.410x10 <sup>-19</sup>          | 9.395x10 <sup>-1</sup> | 1.107                  |
| 50  | 2.159 | 8.372x10 <sup>-1</sup> | 6.123x10 <sup>-1</sup> | 3.385x10 <sup>-1</sup>         | 3.857x10 <sup>-7</sup> | 2.197x10 <sup>-13</sup>          | 7.150x10 <sup>-19</sup>          | 9.508x10 <sup>-1</sup> | 1.136                  |
| 55  | 2.150 | 8.253x10 <sup>-1</sup> | 6.062x10 <sup>-1</sup> | 3.565x10 <sup>-1</sup>         | 5.639x10 <sup>-7</sup> | 4.411x10 <sup>-13</sup>          | 2.034x10 <sup>-18</sup>          | 9.627x10 <sup>-1</sup> | 1.166                  |
| 60  | 2.143 | 8.130x10 <sup>-1</sup> | 6.013x10 <sup>-1</sup> | 3.738x10 <sup>-1</sup>         | 8.149x10 <sup>-7</sup> | 8.663x10 <sup>-13</sup>          | 5.568x10 <sup>-18</sup>          | 9.750x10 <sup>-1</sup> | 1.199                  |
| 65  | 2.138 | 8.002x10 <sup>-1</sup> | 5.974x10 <sup>-1</sup> | 3.904x10 <sup>-1</sup>         | 1.165x10 <sup>-6</sup> | 1.666x10 <sup>-12</sup>          | 1.469x10 <sup>-17</sup>          | 9.878x10 <sup>-1</sup> | 1.234                  |
| 70  | 2.134 | 7.871x10 <sup>-1</sup> | 5.945x10 <sup>-1</sup> | 4.064x10 <sup>-1</sup>         | 1.647x10 <sup>-6</sup> | 3.141x10 <sup>-12</sup>          | 3.746x10 <sup>-17</sup>          | 1.001                  | 1.272                  |
| 75  | 2.133 | 7.737x10 <sup>-1</sup> | 5.925x10 <sup>-1</sup> | 4.218x10 <sup>-1</sup>         | 2.304x10 <sup>-6</sup> | 5.811x10 <sup>-12</sup>          | 9.244x10 <sup>-17</sup>          | 1.014                  | 1.311                  |
| 80  | 2.133 | 7.600x10 <sup>-1</sup> | 5.914x10 <sup>-1</sup> | 4.366x10 <sup>-1</sup>         | 3.193x10 <sup>-6</sup> | 1.056x10 <sup>-11</sup>          | 2.212x10 <sup>-16</sup>          | 1.028                  | 1.353                  |
| 85  | 2.134 | 7.460x10 <sup>-1</sup> | 5.911x10 <sup>-1</sup> | 4.509x10 <sup>-1</sup>         | 4.382x10 <sup>-6</sup> | 1.885x10 <sup>-11</sup>          | 5.142x10 <sup>-16</sup>          | 1.042                  | 1.397                  |
| 90  | 2.137 | 7.318x10 <sup>-1</sup> | 5.915x10 <sup>-1</sup> | 4.646x10 <sup>-1</sup>         | 5.960x10 <sup>-6</sup> | 3.309x10 <sup>-11</sup>          | 1.162x10 <sup>-15</sup>          | 1.056                  | 1.443                  |
| 95  | 2.142 | 7.174x10 <sup>-1</sup> | 5.927x10 <sup>-1</sup> | 4.779x10 <sup>-1</sup>         | 8.034x10 <sup>-6</sup> | 5.716x10 <sup>-11</sup>          | 2.558x10 <sup>-15</sup>          | 1.071                  | 1.492                  |
| 100 | 2.148 | 7.028x10 <sup>-1</sup> | 5.945x10 <sup>-1</sup> | 4.907x10 <sup>-1</sup>         | 1.074x10 <sup>-5</sup> | 9.724x10 <sup>-11</sup>          | 5.489x10 <sup>-15</sup>          | 1.085                  | 1.544                  |
| 105 | 2.155 | 6.881x10 <sup>-1</sup> | 5.969x10 <sup>-1</sup> | 5.030x10 <sup>-1</sup>         | 1.423x10 <sup>-5</sup> | 1.629x10 <sup>-10</sup>          | 1.149x10 <sup>-14</sup>          | 1.100                  | 1.599                  |
| 110 | 2.163 | 6.732x10 <sup>-1</sup> | 5.999x10 <sup>-1</sup> | 5.148x10 <sup>-1</sup>         | 1.871x10 <sup>-5</sup> | 2.691x10 <sup>-10</sup>          | 2.351x10 <sup>-14</sup>          | 1.115                  | 1.656                  |
| 115 | 2.172 | 6.582x10 <sup>-1</sup> | 6.034x10 <sup>-1</sup> | 5.263x10 <sup>-1</sup>         | 2.440x10 <sup>-5</sup> | 4.384x10 <sup>-10</sup>          | 4.703x10 <sup>-14</sup>          | 1.130                  | 1.716                  |
| 120 | 2.182 | 6.432x10 <sup>-1</sup> | 6.074x10 <sup>-1</sup> | 5.374x10 <sup>-1</sup>         | 3.158x10 <sup>-5</sup> | 7.045x10 <sup>-10</sup>          | 9.205x10 <sup>-14</sup>          | 1.145                  | 1.780                  |
| 125 | 2.193 | 6.281x10 <sup>-1</sup> | 6.119x10 <sup>-1</sup> | 5.480x10 <sup>-1</sup>         | 4.058x10 <sup>-5</sup> | 1.117x10 <sup>-9</sup>           | 1.764x10 <sup>-13</sup>          | 1.160                  | 1.847                  |
| 130 | 2.205 | 6.129x10 <sup>-1</sup> | 6.167x10 <sup>-1</sup> | 5.583x10 <sup>-1</sup>         | 5.176x10 <sup>-5</sup> | 1.749x10 <sup>-9</sup>           | 3.315x10 <sup>-13</sup>          | 1.175                  | 1.917                  |
| 135 | 2.218 | 5.978x10 <sup>-1</sup> | 6.219x10 <sup>-1</sup> | 5.683x10 <sup>-1</sup>         | 6.554x10 <sup>-5</sup> | 2.705x10 <sup>-9</sup>           | 6.107x10 <sup>-13</sup>          | 1.190                  | 1.991                  |
| 140 | 2.232 | 5.826x10 <sup>-1</sup> | 6.275x10 <sup>-1</sup> | 5.778x10 <sup>-1</sup>         | 8.244x10 <sup>-5</sup> | 4.133x10 <sup>-9</sup>           | 1.104x10 <sup>-12</sup>          | 1.205                  | 2.069                  |
| 145 | 2.246 | 5.675x10 <sup>-1</sup> | 6.333x10 <sup>-1</sup> | 5.871x10 <sup>-1</sup>         | 1.030x10 <sup>-4</sup> | 6.240x10 <sup>-9</sup>           | 1.960x10 <sup>-12</sup>          | 1.220                  | 2.151                  |
| 150 | 2.262 | 5.524x10 <sup>-1</sup> | 6.394x10 <sup>-1</sup> | 5.960x10 <sup>-1</sup>         | 1.278x10 <sup>-4</sup> | 9.312x10 <sup>-9</sup>           | 3.417x10 <sup>-12</sup>          | 1.235                  | 2.236                  |
| 155 | 2.277 | 5.375x10 <sup>-1</sup> | 6.458x10 <sup>-1</sup> | 6.045x10 <sup>-1</sup>         | 1.575x10 <sup>-4</sup> | 1.374x10 <sup>-8</sup>           | 5.856x10 <sup>-12</sup>          | 1.250                  | 2.326                  |
| 160 | 2.294 | 5.227x10 <sup>-1</sup> | 6.524x10 <sup>-1</sup> | 6.128x10 <sup>-1</sup>         | 1.929x10 <sup>-4</sup> | 2.005x10 <sup>-8</sup>           | 9.867x10 <sup>-12</sup>          | 1.265                  | 2.421                  |
| 165 | 2.311 | 5.080x10 <sup>-1</sup> | 6.591x10 <sup>-1</sup> | 6.207x10 <sup>-1</sup>         | 2.348x10 <sup>-4</sup> | 2.894x10 <sup>-8</sup>           | 1.635x10 <sup>-11</sup>          | 1.280                  | 2.519                  |
| 170 | 2.328 | 4.935x10 <sup>-1</sup> | 6.660x10 <sup>-1</sup> | 6.282x10 <sup>-1</sup>         | 2.840x10 <sup>-4</sup> | 4.132x10 <sup>-8</sup>           | 2.666x10 <sup>-11</sup>          | 1.294                  | 2.622                  |
| 175 | 2.346 | 4.793x10 <sup>-1</sup> | 6.730x10 <sup>-1</sup> | 6.354x10 <sup>-1</sup>         | 3.413x10 <sup>-4</sup> | 5.836x10 <sup>-8</sup>           | 4.279x10 <sup>-11</sup>          | 1.308                  | 2.730                  |
| 180 | 2.364 | 4.653x10 <sup>-1</sup> | 6.801x10 <sup>-1</sup> | 6.422x10 <sup>-1</sup>         | 4.078x10 <sup>-4</sup> | 8.159x10 <sup>-8</sup>           | 6.762x10 <sup>-11</sup>          | 1.322                  | 2.842                  |
| 185 | 2.383 | 4.516x10 <sup>-1</sup> | 6.873x10 <sup>-1</sup> | 6.486x10 <sup>-1</sup>         | 4.844x10 <sup>-4</sup> | 1.129x10 <sup>-7</sup>           | 1.052x10 <sup>-10</sup>          | 1.336                  | 2.959                  |
| 190 | 2.402 | 4.382x10 <sup>-1</sup> | 6.946x10 <sup>-1</sup> | 6.547x10 <sup>-1</sup>         | 5.715x10 <sup>-4</sup> | 1.546x10 <sup>-7</sup>           | 1.613x10 <sup>-10</sup>          | 1.349                  | 3.079                  |
| 195 | 2.422 | 4.252x10 <sup>-1</sup> | 7.018x10 <sup>-1</sup> | 6.603x10 <sup>-1</sup>         | 6.712x10 <sup>-4</sup> | 2.096x10 <sup>-7</sup>           | 2.437x10 <sup>-10</sup>          | 1.362                  | 3.201                  |

**Table S10:** continued

| T   | pH    | Dy <sup>3+</sup>       | DyCl <sup>2+</sup>     | DyCl <sub>2</sub> <sup>+</sup> | DyOH <sup>2+</sup>     | Dy(OH) <sub>2</sub> <sup>+</sup> | Dy(OH) <sub>3</sub> <sup>0</sup> | Dy-Cl complexes | Dy-Cl/Dy <sup>3+</sup> |
|-----|-------|------------------------|------------------------|--------------------------------|------------------------|----------------------------------|----------------------------------|-----------------|------------------------|
| °C  |       | mol/kg                 | mol/kg                 | mol/kg                         | mol/kg                 | mol/kg                           | mol/kg                           | mol/kg          |                        |
| 200 | 2.441 | 4.126x10 <sup>-1</sup> | 7.091x10 <sup>-1</sup> | 6.655x10 <sup>-1</sup>         | 7.835x10 <sup>-4</sup> | 2.813x10 <sup>-7</sup>           | 3.630x10 <sup>-10</sup>          | 1.375           | 3.332                  |
| 205 | 2.461 | 4.004x10 <sup>-1</sup> | 7.164x10 <sup>-1</sup> | 6.703x10 <sup>-1</sup>         | 9.095x10 <sup>-4</sup> | 3.741x10 <sup>-7</sup>           | 5.332x10 <sup>-10</sup>          | 1.387           | 3.463                  |
| 210 | 2.482 | 3.887x10 <sup>-1</sup> | 7.237x10 <sup>-1</sup> | 6.746x10 <sup>-1</sup>         | 1.050x10 <sup>-3</sup> | 4.928x10 <sup>-7</sup>           | 7.724x10 <sup>-10</sup>          | 1.398           | 3.597                  |
| 215 | 2.502 | 3.775x10 <sup>-1</sup> | 7.309x10 <sup>-1</sup> | 6.784x10 <sup>-1</sup>         | 1.206x10 <sup>-3</sup> | 6.433x10 <sup>-7</sup>           | 1.104x10 <sup>-9</sup>           | 1.409           | 3.733                  |
| 220 | 2.523 | 3.669x10 <sup>-1</sup> | 7.381x10 <sup>-1</sup> | 6.816x10 <sup>-1</sup>         | 1.379x10 <sup>-3</sup> | 8.321x10 <sup>-7</sup>           | 1.558x10 <sup>-9</sup>           | 1.420           | 3.870                  |
| 225 | 2.545 | 3.569x10 <sup>-1</sup> | 7.453x10 <sup>-1</sup> | 6.843x10 <sup>-1</sup>         | 1.568x10 <sup>-3</sup> | 1.067x10 <sup>-6</sup>           | 2.172x10 <sup>-9</sup>           | 1.430           | 4.006                  |
| 230 | 2.567 | 3.475x10 <sup>-1</sup> | 7.524x10 <sup>-1</sup> | 6.864x10 <sup>-1</sup>         | 1.776x10 <sup>-3</sup> | 1.357x10 <sup>-6</sup>           | 2.990x10 <sup>-9</sup>           | 1.439           | 4.141                  |
| 235 | 2.589 | 3.388x10 <sup>-1</sup> | 7.595x10 <sup>-1</sup> | 6.877x10 <sup>-1</sup>         | 2.002x10 <sup>-3</sup> | 1.712x10 <sup>-6</sup>           | 4.067x10 <sup>-9</sup>           | 1.447           | 4.271                  |
| 240 | 2.611 | 3.309x10 <sup>-1</sup> | 7.665x10 <sup>-1</sup> | 6.883x10 <sup>-1</sup>         | 2.248x10 <sup>-3</sup> | 2.142x10 <sup>-6</sup>           | 5.470x10 <sup>-9</sup>           | 1.455           | 4.396                  |
| 245 | 2.634 | 3.239x10 <sup>-1</sup> | 7.735x10 <sup>-1</sup> | 6.881x10 <sup>-1</sup>         | 2.514x10 <sup>-3</sup> | 2.660x10 <sup>-6</sup>           | 7.273x10 <sup>-9</sup>           | 1.462           | 4.513                  |
| 250 | 2.658 | 3.178x10 <sup>-1</sup> | 7.805x10 <sup>-1</sup> | 6.868x10 <sup>-1</sup>         | 2.801x10 <sup>-3</sup> | 3.278x10 <sup>-6</sup>           | 9.563x10 <sup>-9</sup>           | 1.467           | 4.617                  |
| 255 | 2.682 | 3.128x10 <sup>-1</sup> | 7.876x10 <sup>-1</sup> | 6.844x10 <sup>-1</sup>         | 3.110x10 <sup>-3</sup> | 4.011x10 <sup>-6</sup>           | 1.244x10 <sup>-8</sup>           | 1.472           | 4.706                  |
| 260 | 2.707 | 3.091x10 <sup>-1</sup> | 7.947x10 <sup>-1</sup> | 6.807x10 <sup>-1</sup>         | 3.442x10 <sup>-3</sup> | 4.872x10 <sup>-6</sup>           | 1.600x10 <sup>-8</sup>           | 1.475           | 4.773                  |
| 265 | 2.732 | 3.068x10 <sup>-1</sup> | 8.020x10 <sup>-1</sup> | 6.754x10 <sup>-1</sup>         | 3.799x10 <sup>-3</sup> | 5.875x10 <sup>-6</sup>           | 2.035x10 <sup>-8</sup>           | 1.477           | 4.815                  |
| 270 | 2.758 | 3.063x10 <sup>-1</sup> | 8.094x10 <sup>-1</sup> | 6.681x10 <sup>-1</sup>         | 4.182x10 <sup>-3</sup> | 7.032x10 <sup>-6</sup>           | 2.560x10 <sup>-8</sup>           | 1.478           | 4.824                  |
| 275 | 2.784 | 3.078x10 <sup>-1</sup> | 8.171x10 <sup>-1</sup> | 6.585x10 <sup>-1</sup>         | 4.593x10 <sup>-3</sup> | 8.355x10 <sup>-6</sup>           | 3.181x10 <sup>-8</sup>           | 1.476           | 4.794                  |
| 280 | 2.812 | 3.120x10 <sup>-1</sup> | 8.250x10 <sup>-1</sup> | 6.460x10 <sup>-1</sup>         | 5.034x10 <sup>-3</sup> | 9.850x10 <sup>-6</sup>           | 3.903x10 <sup>-8</sup>           | 1.471           | 4.715                  |
| 285 | 2.840 | 3.194x10 <sup>-1</sup> | 8.332x10 <sup>-1</sup> | 6.299x10 <sup>-1</sup>         | 5.508x10 <sup>-3</sup> | 1.152x10 <sup>-5</sup>           | 4.721x10 <sup>-8</sup>           | 1.463           | 4.581                  |
| 290 | 2.869 | 3.311x10 <sup>-1</sup> | 8.414x10 <sup>-1</sup> | 6.095x10 <sup>-1</sup>         | 6.018x10 <sup>-3</sup> | 1.335x10 <sup>-5</sup>           | 5.621x10 <sup>-8</sup>           | 1.451           | 4.382                  |
| 295 | 2.898 | 3.485x10 <sup>-1</sup> | 8.495x10 <sup>-1</sup> | 5.834x10 <sup>-1</sup>         | 6.569x10 <sup>-3</sup> | 1.531x10 <sup>-5</sup>           | 6.569x10 <sup>-8</sup>           | 1.433           | 4.112                  |
| 300 | 2.929 | 3.736x10 <sup>-1</sup> | 8.568x10 <sup>-1</sup> | 5.504x10 <sup>-1</sup>         | 7.168x10 <sup>-3</sup> | 1.737x10 <sup>-5</sup>           | 7.509x10 <sup>-8</sup>           | 1.407           | 3.766                  |

## References

- 1 N. C. Hurtig, A. P. Gysi, S. E. Smith-Schmitz and D. Harlov, *Dalton Trans*, 2024.
- 2 T. Wagner, D. A. Kulik, F. F. Hingerl and S. V. Dmytrieva, *Can. Mineral.*, 2012, **50**, 1173–1195.
- 3 H. C. Helgeson, D. H. Kirkham and G. C. Flowers, *Am. J. Sci.*, 1981, **281**, 1249–1516.
- 4 E. L. Shock and H. C. Helgeson, *Geochim. Cosmochim. Acta*, 1988, **52**, 2009–2036.
- 5 J. C. Tanger and H. C. Helgeson, *Am. J. Sci.*, 1988, **288**, 19–98.
- 6 E. L. Shock, E. H. Oelkers, J. W. Johnson, D. A. Sverjensky and H. C. Helgeson, *J Chem Soc Faraday Trans*, 1992, **88**, 803–826.
- 7 J. Kestin, J. V. Sengers, B. Kamgar-Parsi and J. M. H. L. Sengers, *J. Phys. Chem. Ref. Data*, 1984, **13**, 175–183.
- 8 J. Kielland, *J. Am. Chem. Soc.*, 1937, **59**, 1675–1678.
- 9 G. D. Miron, T. Wagner, D. A. Kulik and C. A. Heinrich, *Geochim. Cosmochim. Acta*, 2016, **187**, 41–78.
- 10 G. W. Beall, W. O. Milligan and H. A. Wolcott, *J. Inorg. Nucl. Chem.*, 1977, **39**, 65–70.
- 11 G. Schaack and J. A. Koningstein, *J. Opt. Soc. Am.*, 1970, **60**, 1110.
- 12 M. V. Abrashev, N. D. Todorov and J. Geshev, *J. Appl. Phys.*, 2014, **116**, 103508.
- 13 G. N. Papatheodorou, *J. Chem. Phys.*, 1977, **66**, 2893–2900.
- 14 G. Oczko and L. Macalik, *Polyhedron*, 2010, **29**, 1231–1236.
- 15 I. I. Diakonov, K. V. Ragnarsdottir and B. R. Tagirov, *Chem. Geol.*, 1998, **151**, 327–347.
- 16 E. L. Shock, D. C. Sassani, M. Willis and D. A. Sverjensky, *Geochim. Cosmochim. Acta*, 1997, **61**, 907–950.
- 17 Art. A. Migdisov, A. E. Williams-Jones and T. Wagner, *Geochim. Cosmochim. Acta*, 2009, **73**, 7087–7109.
- 18 J. R. Haas, E. L. Shock and D. C. Sassani, *Geochim. Cosmochim. Acta*, 1995, **59**, 4329–4350.
- 19 B. R. Tagirov, A. V. Zotov and N. N. Akinfiyev, *Geochim. Cosmochim. Acta*, 1997, **61**, 4267–4280.
