# Supplementary material for: In situ Raman investigation of Dy complexation in Cl-bearing aqueous solutions at 20–300 °C
Source: Royal Society of Chemistry journal article supplement (doi:10.1039/d4dt02170c), 2025-01-01
Supplement: d4dt02170c11.xlsx [file d4dt02170c11.xlsx]

## Sheet: Table-1
Table 1: Composition of all experimental solutions.
Solution ID	T	pH (25 °C)	HCl	DyCl3	NaCl	Cl	Cl/Dy
	°C		mol/kg	mol/kg	mol/kg	mol/kg
Pure water
MilliQ	20-300	7	-	-	-		-
Water-NaCl-HCl
1mNaCl-pH2	20-300	2	0.00998726	-	1.00472	1.01474	-
1.7mNaCl-pH2	20-300	2.02a	0.0100217	-	1.66159	1.67157	-
1.7mNaCl-pH4	20-300	3.99a	0.00011994	-	1.65099	1.65111	-
1mNaCl-pH5	20-300	5.01	1.172e-05	-	0.998985	0.998996	-
2.9mNaCl-pH7	20-300	6.93a	-	-	2.91116	2.91116	-
Water-DyCl3-HCl
0.14mDyCl3-pH2	20-300	2.03	0.0110222	0.142129	-	0.43741	3.07755
0.27mDyCl3-pH2	20-300	2.01	0.0103194	0.270574	-	0.82204	3.03814
0.59mDyCl3-pH2	20-300	2.17a	0.0099542	0.592828	-	1.78844	3.01679
1.8mDyCl3-pH2	20-300	2.27a	0.01102	1.78778	-	5.37355	3.00571
a pH calculated using GEM-Selektor from pH measured in dilute salt free HCl solutions and added salt amount

## Sheet: Table-2
Table 2: Raman modes of the main vibrational peak centers for Dy-O and Dy-Cl in reference Dy solids measured using the 532 nm and the 266 nm excitation laser.
Vibrational modes	Dy2O3	Dy2O3	Dy(OH)3	Dy(OH)3	DyCl3 anhydrous	DCl3·xH2O	DCl3·xH2O
	cm-1	cm-1	cm-1	cm-1	cm-1	cm-1	cm-1
Laser (nm)	532	266	532	266	266	532	266
ν s, Dy-Cl(a)						153-159
ν as, Dy-Cl(a)					242-272	240	237-269
ν Dy-O(b)	372	370	314-502	311-499
ν Dy-H2O(e-g)						315-359	314-348
ν,H2O(a)						3224-3442	3231-3444
νOH(c-e)			3597-3611	3598-3612
References: (a) Oczko and Macalik (2010); (b) Papatheodorou (1977); (c) Arunachalam et al. (2018); (d) Sanivarapu et al. (2018); (e)Hurtig et al. (2024); (f) Schaack and Koningstein (1970); (g) Abrashev et al. (2014)

## Sheet: Table-3
Table 3: Peak center positions and peak areas in the range of 300-400 cm-1 and total area of water stretching band (AH2O,S) for background solutions.
Solution ID	T	vH2O,L-1	AH2O,L-1	vH2O,S	AH2O,S
	°C	cm-1		cm-1
MilliQ	20	-	-	3271-3588	98909
MilliQ	100	367.341	1.19668	3288-3584	98916.4
MilliQ	150	370.498	1.0769	3323-3578	98516.4
MilliQ	200	370.829	1.2626	3291-3579	98702.1
MilliQ	250	370.154	2.36044	3247-3571	98303.4
MilliQ	300	367.611	1.26448	3251-3566	98780.8
1 m NaCl-pH2	20	-	-	3271-3588	99268.2
1 m NaCl-pH2	100	372.44	1.23709	3288-3584	98794.8
1 m NaCl-pH2	150	369.738	1.31773	3323-3578	98288.4
1 m NaCl-pH2	200	371.53	1.26057	3291-3579	98763.8
1 m NaCl-pH2	250	372.68	1.55203	3247-3571	99106.5
1 m NaCl-pH2	300	367.138	1.57488	3251-3566	97645.1
1.7 m NaCl-pH2	20	-	-	3271-3588	99235.2
1.7 m NaCl-pH2	100	367.013	1.23556	3288-3584	98657.6
1.7 m NaCl-pH2	150	367.377	1.61012	3323-3578	98948
1.7 m NaCl-pH2	200	369.891	1.88	3291-3579	98386.3
1.7 m NaCl-pH2	250	369.271	2.03096	3247-3571	98749.5
1.7 m NaCl-pH2	300	376.182	1.92037	3251-3566	98416.6
1.7 m NaCl-pH4	20	-	-	3271-3588	99201
1.7 m NaCl-pH4	100	369.502	1.22428	3288-3584	98928.1
1.7 m NaCl-pH4	150	370.24	1.73769	3323-3578	98817.6
1.7 m NaCl-pH4	200	367.926	1.94224	3291-3579	98763.8
1.7 m NaCl-pH4	250	367.316	2.11012	3247-3571	98901.4
1.7 m NaCl-pH4	300	368.095	2.44152	3251-3566	98148.9
1 m NaCl-pH5	20	-	-	3271-3588	99266.1
1 m NaCl-pH5	100	372.942	1.16208	3288-3584	98751.3
1 m NaCl-pH5	150	369.839	1.18485	3323-3578	98740
1 m NaCl-pH5	200	370.137	1.34725	3291-3579	98750.7
1 m NaCl-pH5	250	374.618	1.65402	3247-3571	98936.1
1 m NaCl-pH5	300	365.271	1.69165	3251-3566	98398.9
3 m NaCl-pH7	20	-	-	3271-3588	99140.2
3 m NaCl-pH7	100	374.298	1.25182	3288-3584	98933.4
3 m NaCl-pH7	150	370.582	1.94353	3323-3578	98992.6
3 m NaCl-pH7	200	370.678	2.26276	3291-3579	98829.9
3 m NaCl-pH7	250	368.805	1.6454	3247-3571	98780.8
3 m NaCl-pH7	300	370.029	1.96215	3251-3566	97883.9

## Sheet: Table-4
Table 4: Peak center positions and peak areas for Dy-O and Dy-Cl Raman modes in the range of 200-400 cm-1 in DyCl3-bearing solutions.
		Dy-O		Dy-Cl
Solution ID	T	ν1, Dy-O	ADy-O,corr.	ν Dy-Cl	ADy-Cl	ADy-Cl/ADy-O, corr.	vH2O,S	AH2O,S
	°C	(cm-1)		(cm-1)			(cm-1)
0.14mDyCl3-pH2	20	384.262	1.53262	-	-	-	3271-3588	99346.5
0.14mDyCl3-pH2	100	373.958	0.567652	-	-	-	3288-3584	98826.6
0.14mDyCl3-pH2	150	368.682	0.18649	233.247	0.317319	1.70153	3323-3578	98556
0.14mDyCl3-pH2	200	-	-	240.67	0.600776	-	3291-3579	98601.1
0.14mDyCl3-pH2	250	-	-	237.67	0.914078	-	3247-3571	98202
0.14mDyCl3-pH2	300	-	-	241.022	1.58932	-	3251-3566	97046.9
0.27mDyCl3-pH2	20	381.377	2.71105	-	-	-	3271-3588	99214.9
0.27mDyCl3-pH2	100	372.755	1.97	-	-	-	3288-3584	98754.3
0.27mDyCl3-pH2	150	370.668	1.73392	239.473	0.48245	0.278242	3323-3578	98633.2
0.27mDyCl3-pH2	200	370.338	1.299	238.473	0.937266	0.721527	3291-3579	98537.5
0.27mDyCl3-pH2	250	-	-	238.518	1.55864	-	3247-3571	98250.4
0.27mDyCl3-pH2	300	-	-	242.051	3.0468	-	3251-3566	97586.1
0.59mDyCl3-pH2	20	378.638	5.39851	-	-	-	3271-3588	99084.8
0.59mDyCl3-pH2	100	373.277	4.4224	239.029	0.626837	0.141741	3288-3584	98725.4
0.59mDyCl3-pH2	150	370.629	3.63517	238.425	1.00011	0.275121	3323-3578	98672.3
0.59mDyCl3-pH2	200	367.641	3.24194	238.119	1.77969	0.548958	3291-3579	98610.6
0.59mDyCl3-pH2	250	367.575	2.77329	239	3.2834	1.18394	3247-3571	98445
0.59mDyCl3-pH2	300	365.541	2.70655	243.7	7.60122	2.80846	3251-3566	97573.8
1.8mDyCl3-pH2	20	378.005	12.7975	-	-	-	3271-3588	98218.6
1.8mDyCl3-pH2	100	372.719	10.6615	240.835	2.6826	0.251616	3288-3584	98553.4
1.8mDyCl3-pH2	150	370.297	9.47303	240.385	3.83836	0.405188	3323-3578	98836.1
1.8mDyCl3-pH2	200	367.143	8.00645	237.033	6.61194	0.825826	3291-3579	98566.7
1.8mDyCl3-pH2	250	366.07	6.16414	239.262	12.0461	1.95422	3247-3571	99499.1
1.8mDyCl3-pH2	300	365.287	4.34159	244.481	26.1566	6.02468	3251-3566	97939.5

## Sheet: Table-S1
Table S1: Crystal lattice parameters of Dy hydroxide [Dy(OH)3(s)] with a hexagonal crystal structure in the P63/m space group derived from Rietveld refinement of powder XRD data.
	a	c	α	γ
Data source	Å	Å	°	°
This study	6.287	3.575	90.1	119.9
Beall et al. (1977)	6.286	3.577	90	120

## Sheet: Table-S2
Table S2: Peak centers for vibrational modes in reference Dy solids measured using the 532 nm and the 266 nm excitation lasers.
Dy2O3	Dy2O3	Vibrational modes	Dy(OH)3	Dy(OH)3	Vibrational modes	DyCl3 anhydrous	Vibrational modes	DyCl3·xH2O	DyCl3·xH2O	Vibrational modes
cm-1	cm-1		cm-1	cm-1		cm-1		cm-1	cm-1
532 nm	266 nm	(a-c)	532 nm	266 nm	(c-d)	266 nm	(f,g)	532 nm	266 nm	(g)
95		Fg	133.248					62		lattice vibrations
119		Fg+Ag/Ag	261.815					74		lattice vibrations
135		Fg	313.504	311	Ag			85
145		Eg	395.325	392	Ag / E2g			94		δODyCl and δClDyCl
176		Fg+Eg/Fg	405.702	405	Ag			106		δODyCl and δClDyCl
264	264	Eg/Eg+Fg	501.756	499	E1g			111		δODyCl and δClDyCl
327	326		696.589	692				135		δODyCl and δClDyCl
	349		735.531	731				153
372	370	Fg+Ag/Fg	1077	1079	δOH			159		vDy-Cl
424	424	Fg/Ag	3597.08	3598	vOH			168		vDy-Cl
463	461	Fg	3611.03	3612	vOH			193		δODyO
	522							209	211	δODyO
567	561					242.442	vDy-Cl	240	237.447	vDy-Cl
584	583	Fg				255.456	vDy-Cl		268.897	vDy-Cl
592	596					271.561	vDy-Cl	314.539	313.992	vDy-H2O
						340.213	vDy-H2O	358.572	347.96	vDy-H2O
						383.385			485.477
						425.021		527.739		ωH2O
						526.775	ωH2O	563.92	568.74	ωH2O
								600.48	603.512	ωH2O
						646.54	ωH2O	618.368	634.997	ωH2O
								670.431	671.783	ωH2O
						1598.17	δHOH	1621.03	1622.21	δHOH
						1637.6	δHOH	1637.4	1637.6	δHOH
								1648.47	1648.87	δHOH
								3224.26	3230.58	vH2O
								3284.55	3279.74	vH2O
						3383.29	vH2O	3343.5	3342.77	vH2O
						3470.58	vH2O	3394.28	3397.2	vH2O
						3534.24	vH2O	3442.39	3444.42	vH2O
References: (a) Schaack and Koningstein (1970), (b) Abrashev et al. (2014), (c) Hurtig et al. (2024), (d) Arunachalam et al. (2018), (e) Sanivarapu et al. (2018), (f) Papatheodorou, 1977, (g) Oczko and Macalik, 2010

## Sheet: Table-S3
Table S3: Peak center positions, peak areas, and full width half maximum (FWHM) for Raman modes in the low frequency region for background H2O-NaCl solutions.
	vH2O,L-1	AH2O,L-1	FWHM
	cm-1		cm-1
Background solutions
100 °C
MilliQ	367.341	1.19668	39.9404
1mNaCl-pH2	372.44	1.23709	40.6797
1.7mNaCl-pH2	367.013	1.23556	36.4942
1.7mNaCl-pH4	369.502	1.22428	35.1554
1mNaCl-pH5	372.942	1.16208	34.5213
3mNaCl-pH7	374.298	1.25182	44.8083
average		1.21792
3σ		0.0989324
150 °C
MilliQ	370.498	1.0769	31.3324
1mNaCl-pH2	369.738	1.31773	32.9958
1.7mNaCl-pH2	367.377	1.61012	32.4594
1.7mNaCl-pH4	370.24	1.73769	34.4082
1mNaCl-pH5	369.839	1.18485	28.337
3mNaCl-pH7	370.582	1.94353	37.5653
average		1.47847
3σ		1.01657
200 °C
MilliQ	370.829	1.2626	30.0043
1mNaCl-pH2	371.53	1.26057	30.9984
1.7mNaCl-pH2	369.891	1.88	32.5804
1.7mNaCl-pH4	367.926	1.94224	31.9594
1mNaCl-pH5	370.137	1.34725	34.0379
3mNaCl-pH7	370.678	2.26276	38.9172
average		1.65924
3σ		1.27749
250 °C
MilliQ	370.154	2.36044	38.6798
1mNaCl-pH2	372.68	1.55203	32.8604
1.7mNaCl-pH2	369.271	2.03096	33.8158
1.7mNaCl-pH4	367.316	2.11012	37.3513
1mNaCl-pH5	374.618	1.65402	35.1749
3mNaCl-pH7	368.805	1.6454	38.9984
average		1.89216
3σ		0.966864
300 °C
MilliQ	367.611	1.26448	31.6676
1mNaCl-pH2	367.138	1.57488	35.2928
1.7mNaCl-pH2	376.182	1.92037	41.702
1.7mNaCl-pH4	368.095	2.44152	34.9516
1mNaCl-pH5	365.271	1.69165	38.6157
3mNaCl-pH7	370.029	1.96215	44.7193
average		1.80917
3σ		1.20077
Symbols: vH2O,L-1 = peak center position of the librational mode in background solutions used to correct v1,Dy-O; AH2O,L-1 = peak area of the librational mode in background solutions used to correct v1,Dy-O; Av1,Dy-O, raw = uncorrected peak area of the Dy-O mode; Av1,Dy-O, corr. = peak area of the Dy-O mode corrected using the peak areas of vH2O,L-1; ADy-Cl = peak area of the Dy-Cl mode; AH2O,S =…

## Sheet: Table-S4
Table S4: Peak center positions, peak areas, and FWHM for Raman modes in the water stretching band at 3000-3800 cm-1 for background H2O-NaCl and DyCl3-bearing solutions.
	Sub-peak S-1				Sub-peak S-2				Sub-peak S-3				Total
	vH2O,S-1	AH2O,S-1	FWHM	AH2O,S-1/AH2O,S	vH2O,S-2	AH2O,S-2	FWHM	AH2O,S-2/AH2O,S	vH2O,S-3	AH2O,S-3	FWHM	AH2O,S-3/AH2O,S	AH2O,S
Solution ID	cm-1		cm-1		cm-1		cm-1		cm-1		cm-1
Background solutions
Ambient T
MilliQ	3270.63	58666.5	288.746	0.593136	3446.39	25806	158.811	0.260906	3588.36	14436.5	152.575	0.145957	98909
1mNaCl-pH2	3270.63	51058.7	275.279	0.514351	3446.39	33814	166.947	0.340633	3588.36	14395.5	148.922	0.145016	99268.2
1.7mNaCl-pH2	3270.63	47253.8	265.837	0.47618	3446.39	37604.4	168.517	0.378942	3588.36	14377	148.717	0.144878	99235.2
1.7mNaCl-pH4	3270.63	47219.9	266.255	0.476002	3446.39	37550.9	169.066	0.378533	3588.36	14430.2	149.82	0.145464	99201
1mNaCl-pH5	3270.63	51087.7	274.618	0.514654	3446.39	33924.8	167.832	0.341756	3588.36	14253.6	150.494	0.14359	99266.1
3mNaCl-pH7	3270.63	40323.5	251.958	0.406732	3446.39	44810.5	173.368	0.451991	3588.36	14006.2	148.373	0.141277	99140.2
100 °C
MilliQ	3288.48	42680.1	270.008	0.431476	3452.12	34246	166.283	0.346212	3583.66	21990.3	160.024	0.222312	98916.4
1mNaCl-pH2	3288.48	36956.4	259.641	0.374072	3452.12	40094.1	169.118	0.405832	3583.66	21744.3	156.092	0.220096	98794.8
1.7mNaCl-pH2	3288.48	34788	255.846	0.352613	3452.12	42446.8	168.128	0.430244	3583.66	21422.8	153.31	0.217143	98657.6
1.7mNaCl-pH4	3288.48	34846.4	254.939	0.35224	3452.12	42677.1	169.749	0.431395	3583.66	21404.6	155.425	0.216365	98928.1
1mNaCl-pH5	3288.48	37047.3	260.627	0.375158	3452.12	39984.2	169.28	0.404898	3583.66	21719.8	156.314	0.219944	98751.3
3mNaCl-pH7	3288.48	30995	246.009	0.313292	3452.12	47263.5	170.017	0.47773	3583.66	20674.9	153.512	0.208978	98933.4
150 °C
MilliQ	3292.87	32369.8	257.629	0.328573	3452.72	37650.6	167.665	0.382176	3578.32	28496	164.105	0.289251	98516.4
1mNaCl-pH2	3292.87	28626.6	251.591	0.291251	3452.72	41527	167.323	0.422502	3578.32	28134.8	159.982	0.286247	98288.4
1.7mNaCl-pH2	3292.87	27470.1	246.357	0.277622	3452.72	43800	167.252	0.442657	3578.32	27677.9	159.079	0.279722	98948
1.7mNaCl-pH4	3292.87	27741.4	250.083	0.280733	3452.72	43109	165.972	0.436248	3578.32	27967.2	160.805	0.283018	98817.6
1mNaCl-pH5	3292.87	28662.2	251.548	0.29028	3452.72	41817.6	167.853	0.423512	3578.32	28260.2	160.026	0.286208	98740
3mNaCl-pH7	3292.87	25487.6	239.592	0.25747	3452.72	47118.5	165.853	0.47598	3578.32	26386.5	155.953	0.26655	98992.6
200 °C
MilliQ	3290.99	22645.9	246.962	0.229437	3466.12	46018.5	185.368	0.466236	3578.8	30037.7	167.175	0.304327	98702.1
1mNaCl-pH2	3290.99	23215.6	254.456	0.235062	3466.12	49494.7	191.454	0.501142	3578.8	26053.5	169.058	0.263796	98763.8
1.7mNaCl-pH2	3290.99	21592.3	243.392	0.219464	3466.12	49946.6	182.784	0.507658	3578.79	26847.4	164.164	0.272877	98386.3
1.7mNaCl-pH4	3290.99	21251.5	240.615	0.215064	3466.12	50616.5	184.312	0.512236	3578.8	26946.9	163.143	0.272701	98814.9
1mNaCl-pH5	3290.99	23224.4	254.47	0.235182	3466.12	49481.4	191.379	0.501074	3578.8	26044.9	168.974	0.263744	98750.7
3mNaCl-pH7	3290.99	20151.4	240.86	0.2039	3466.12	54729.5	187.984	0.553775	3578.8	23949	163.912	0.242325	98829.9
250 °C
MilliQ	3246.83	8811.18	166.459	0.0896325	3498.4	78652.3	240.602	0.800098	3570.68	10839.9	112.135	0.11027	98303.4
1mNaCl-pH2	3246.83	10285.4	184.548	0.103781	3498.4	83619.8	240.299	0.843737	3570.68	5201.31	85.5842	0.052482	99106.5
1.7mNaCl-pH2	3246.83	10247.6	184.246	0.103774	3498.4	83857.2	237.103	0.849191	3570.68	4644.68	85.0212	0.047035	98749.5
1.7mNaCl-pH4	3246.83	10268.6	185.862	0.103827	3498.4	83976.7	237.846	0.849095	3570.68	4656.13	84.3211	0.0470785	98901.4
1mNaCl-pH5	3246.83	10257.3	184.634	0.103676	3498.4	83473.7	240.781	0.843713	3570.68	5205.15	85.9222	0.0526112	98936.1
3mNaCl-pH7	3246.83	11040.2	195.137	0.111765	3498.4	83212.4	230.137	0.842395	3570.68	4528.15	84.9991	0.0458404	98780.8
300 °C
MilliQ	3251	6097.18	143.241	0.0624423	3501.18	71050.1	235.545	0.727636	3566.38	20497.8	114.151	0.209921	97645.1
1mNaCl-pH2	3251	6701.25	149.431	0.0680907	3501.18	76599.7	237.153	0.778321	3566.38	15115.6	104.93	0.153588	98416.6
1.7mNaCl-pH2	3251	7294.26	158.325	0.074481	3501.18	76931.8	233.526	0.785543	3566.38	13708.5	105.112	0.139976	97934.6
1.7mNaCl-pH4	3251	7238.25	156.83	0.0737477	3501.18	77644.6	234.575	0.79109	3566.38	13266	102.623	0.135162	98148.9
1mNaCl-pH5	3251	6857.85	152.463	0.0696943	3501.18	76190.5	236.184	0.774302	3566.38	15350.6	105.741	0.156004	98398.9
3mNaCl-pH7	3251	8140.83	161.762	0.0831682	3501.18	79980.8	228.877	0.817099	3566.38	9762.24	93.2966	0.0997329	97883.9
Water-DyCl3-HCl
Ambient T
0.14mDyCl3-pH2	3270.63	56759.8	286.711	0.571332	3446.39	28591.2	160.622	0.287793	3588.36	13995.5	151.876	0.140876	99346.5
0.27mDyCl3-pH2	3270.63	55116.2	286.065	0.555523	3446.39	30481.8	163.576	0.30723	3588.36	13616.9	150.913	0.137247	99214.9
0.59mDyCl3-pH2	3270.63	51937.9	285.531	0.524176	3446.39	34640.7	169.878	0.349607	3588.36	12506.2	149.263	0.126217	99084.8
1.8mDyCl3-pH2	3270.63	44028.6	290.099	0.448272	3446.39	46799.6	185.727	0.476484	3588.36	7390.37	139.219	0.0752441	98218.6
100 °C
0.14mDyCl3-pH2	3288.48	40913	271.632	0.413988	3452.12	36335.2	168.08	0.367666	3583.66	21578.4	158.89	0.218346	98826.6
0.27mDyCl3-pH2	3288.48	40802.2	274.525	0.413169	3452.12	37350.3	170.812	0.378214	3583.66	20601.8	156.517	0.208617	98754.3
0.59mDyCl3-pH2	3288.48	40786.3	284.221	0.413129	3452.12	38967	171.809	0.394701	3583.66	18972.1	156.743	0.19217	98725.4
1.8mDyCl3-pH2	3288.48	42760.3	312.72	0.43388	3452.12	43928.5	180.418	0.445733	3583.66	11864.6	151.284	0.120388	98553.4
150 °C
0.14mDyCl3-pH2	3292.87	33357.4	266.829	0.338461	3452.72	38114.7	168.252	0.386731	3578.32	27083.9	163.206	0.274807	98556
0.27mDyCl3-pH2	3292.87	31906.8	267.243	0.323489	3452.72	39441.9	169.53	0.399885	3578.32	27284.5	161.041	0.276626	98633.2
0.59mDyCl3-pH2	3292.87	33351.9	282.089	0.338007	3452.72	40439.3	171.032	0.409834	3578.32	24881.1	161.136	0.252159	98672.3
1.8mDyCl3-pH2	3292.87	40315.1	322.623	0.407899	3452.72	42503.5	176.155	0.43004	3578.32	16017.5	154.644	0.162061	98836.1
200 °C
0.14mDyCl3-pH2	3290.99	24824.9	262.3	0.251771	3466.12	45610.4	184.75	0.462575	3578.8	28165.8	166.158	0.285654	98601.1
0.27mDyCl3-pH2	3290.99	23952.7	263.091	0.243082	3466.12	46748.6	186.908	0.474424	3578.8	27836.2	162.978	0.282493	98537.5
0.59mDyCl3-pH2	3290.99	27424.1	276.688	0.278105	3466.12	47553.2	188.318	0.482232	3578.8	23633.3	169.284	0.239663	98610.6
1.8mDyCl3-pH2	3290.99	35638	327.28	0.361562	3466.12	47889.9	192.055	0.485863	3578.8	15038.8	162.74	0.152575	98566.7
250 °C
0.14mDyCl3-pH2	3246.83	10260.8	183.688	0.104487	3498.4	78960.7	238.608	0.804064	3570.68	8980.52	106.309	0.0914494	98202
0.27mDyCl3-pH2	3246.83	10966.3	193.045	0.111616	3498.4	79248.8	240.52	0.8066	3570.68	8035.28	98.1019	0.0817837	98250.4
0.59mDyCl3-pH2	3246.83	14256.8	228.061	0.14482	3498.4	78945.3	236.885	0.801923	3570.68	5242.88	85.4044	0.053257	98445
1.8mDyCl3-pH2	3246.83	25113.1	293.346	0.252395	3498.4	74025.6	227.848	0.743983	3570.68	360.371	37.9551	0.00362185	99499.1
300 °C
0.14mDyCl3-pH2	3251	6232.92	149.8	0.0642258	3501.18	68645	237.763	0.707338	3566.38	22169	115.945	0.228436	97046.9
0.27mDyCl3-pH2	3251	7912.55	168.026	0.0810827	3501.18	73109.2	234.651	0.749176	3566.38	16564.4	105.244	0.169741	97586.1
0.59mDyCl3-pH2	3251	9519.99	193.713	0.0975671	3501.18	71749.4	233.716	0.735335	3566.38	16304.4	105.351	0.167098	97573.8
1.8mDyCl3-pH2	3251	20102.5	273.64	0.205254	3501.18	72270.7	220.745	0.737911	3566.38	5566.34	85.055	0.0568345	97939.5
Symbols: vH2O,S-1 to vH2O,S-3 = peak center positions of sub-peaks S-1 to S-3 of the water stretching band; AH2O,S-1 to AH2O,S-3 = peak areas of sub-peaks S-1 to S-3 of the water stretching band; AH2O,S = total peak area of the water stretching band; AH2O,S-1/AH2O,S to AH2O,S-3/AH2O,S = ratios of peak areas of sub-peaks S-1 to S-3 to the total peak area of the water stretching band.

## Sheet: Table-S5
	Table S5: Peak center positions, peak areas, and FWHM for Raman modes in the region of 200-400 cm-1 in DyCl3-bearing solutions.
		Dy-O				Dy-Cl
		v1,Dy-O	ADy-O,raw	FWHM	ADy-O,corr.	vDy-Cl	ADy-Cl	FWHM
		cm-1		cm-1		cm-1		cm-1
	Ambient T
	0.14mDyCl3-pH2	384.262	1.53262	38.2008	-	-	-	-
	0.27mDyCl3-pH2	381.377	2.71105	46.3398	-	-	-	-
	0.59mDyCl3-pH2	378.638	5.39851	44.8939	-	-	-	-
	1.8mDyCl3-pH2	378.005	12.7975	43.9734	-	-	-	-
	100 °C
	0.14mDyCl3-pH2	373.958	1.78557	31.9991	0.567652	-	-	-
	0.27mDyCl3-pH2	372.755	3.18792	39.7252	1.97	-	-	-
	0.59mDyCl3-pH2	373.277	5.64032	46.5497	4.4224	239.029	0.778449	27.6386
	1.8mDyCl3-pH2	372.719	11.8794	44.2687	10.6615	240.835	2.6826	31.0226
	150 °C
	0.14mDyCl3-pH2	368.682	1.66496	29.7395	0.18649	233.247	0.317319	20.3579
	0.27mDyCl3-pH2	370.668	3.21239	41.3744	1.73392	239.473	0.48245	26.2269
	0.59mDyCl3-pH2	370.629	5.11364	45.6691	3.63517	238.425	1.00011	32.3876
	1.8mDyCl3-pH2	370.297	10.9515	42.9918	9.47303	240.385	3.83836	32.8472
	200 °C
	0.14mDyCl3-pH2	367.827	2.21385	43.1533	0.554613	240.67	0.600776	28.6431
	0.27mDyCl3-pH2	370.338	2.95824	40.1469	1.299	238.473	0.937266	29.4399
	0.59mDyCl3-pH2	367.641	4.90118	43.2482	3.24194	238.119	1.77969	32.4252
	1.8mDyCl3-pH2	367.143	9.66569	41.9404	8.00645	237.033	6.61194	40.2603
	250 °C
	0.14mDyCl3-pH2	369.627	2.3285	29.3632	0.436338	237.67	0.914078	28.5183
	0.27mDyCl3-pH2	367.563	2.81135	45.3549	0.91919	238.518	1.55864	33.141
	0.59mDyCl3-pH2	367.575	4.66545	44.7975	2.77329	239	3.2834	42.0651
	1.8mDyCl3-pH2	366.07	8.0563	41.7394	6.16414	239.262	12.0461	39.1794
	300 °C
	0.14mDyCl3-pH2	370	2.69739	36.0492	0.888215	241.022	1.58932	37.0007
	0.27mDyCl3-pH2	369.287	2.91059	37.3627	1.10142	242.051	3.0468	29.2083
	0.59mDyCl3-pH2	365.541	4.51572	47.8102	2.70655	243.7	7.60122	40.1577
	1.8mDyCl3-pH2	365.287	6.15076	41.2455	4.34159	244.481	26.1566	42.2928
	Symbols: vH2O,L-1 = peak center position of the librational mode in background solutions used to correct v1,Dy-O; v1,Dy-O = peak center position of the main stretching vibration of the Dy-O bond; vDy-Cl = peak center position of the main stretching vibration of the Dy-Cl bond; AH2O,L-1 = peak area of the librational mode in background solutions used to correct v1,Dy-O; Av1,Dy-O, raw = uncorrected…

## Sheet: Table-S6
Table S6: Thermodynamic data for solid and aqueous species included in calculations of aqueous Dy speciation.
Solids	ΔfG°	ΔfH°	S°	V°	CP°	a0	a1 ×104	a2×10-3	a3×10-2				Refs
	kJ·mol-1	kJ·mol-1	J·mol-1 ·K-1	J·bar-1	J·K-1·mol-1	J·K-1·mol-1	J·K-2·mol-1	J·K·mol-1	J·mol-1
Dy(OH)3(s)	-1294800	-1428400	130.3	3.5493	114.05	174.6	122.88	1137.18	-229.599				1
Aqueous species	ΔfG°	ΔfH°	S°	V°	Cp°	a1	a2	a3	a4	c1	c2	w0
	J·mol-1	J·mol-1	J·mol-1·K-1	J·bar-1	J·K-1·mol-1	cal·bar-1·mol-1	cal·mol-1	cal·K·bar-1·mol-1	cal·K ·mol-1	cal·K-1 ·mol-1	cal·K·mol-1	cal·mol-1
Dy3+	-664001	-696711	-231	-4.1428	-131.61	-0.30003	-1510.74	11.6879	-21545	9.5076	-99419	237920	2,3
DyCl2+	799270	-866777	-170.791	-1.99046	146.015	-0.03106	-853.96	9.1065	-24260	42.1744	40696	170640	4
DyCl2+	-929057	-1020000	-72.51	0.412873	67.2407	0.26363	-134.44	6.2785	-27234	22.9371	2368	80650	4
DyOH2+	-856465	-903493	-45.6	0.2827	-103.24	0.26154	-139.41	6.295	-27213	2.8769	-80863	122060	5
DyO+	-809186	-836884	19.3	0.5453	-276.36	0.26935	-120.56	6.2255	-27291	-28.1511	-164991	47990	5
DyO2H0	-996629	-1050602	163.6	2.151	-473.22	0.46969	368.55	4.3051	-29313	-60.3933	-260730	-3000	5
DyO2-	-947258	-1014536	119.7	1.8435	-390.27	0.47414	379.36	4.2636	-29357	-37.5629	-220601	119490	5
HCl0	-127240	-179450	1.76	1.63753	149.2	1.61573	-1143.11	-46.1866	-23036.4	46.4716	-52811	0	6
Cl -	-131290	-167080	56.735	1.7341	-122.49	0.4032	480.1	5.563	-28470	-4.4	-57140	14560	3
OH-	-157297	-230024	-10.7	-0.4708	-136.34	0.12527	7.38	1.8423	-27821	4.15	-103460	172460	3
H+	0	0	0	0	0	0	0	0	0	0	0		3
H2O0	-237183	-285881	69.9	1.8068	75.36	-	-	-	-	-	-		7
(1) Diakonov et al. 1998, (2) Shock et al. (1997); (3) Shock and Helgeson (1988), (4) Migdisov et al., (2009), (5) Haas et al. (1995), (6) Tagirov et al. (1997), (7) IAPS-84 equation-of-state (Kestin et al., 1984)

[truncated: 4 more sheets: Table-S7, Table-S8, Table-S9, Table-S10]
